# Supplementary material
Source: publisher figshare collection journal article supplement (https://acs.figshare.com/ndownloader/files/5197528)

# SUPPORTING INFORMATION

## Total Synthesis of Dendroamide A: Oxazole and Thiazole Construction

### Using an Oxodiphosphonium Salt

Shu-Li You and Jeffery W. Kelly\*

*Department of Chemistry and The Skaggs Institute of Chemical Biology, The Scripps*

*Research Institute, La Jolla, California 92037 (USA).*

*jkelly@scripps.edu*

### Supporting Information

#### Table of Contents

General procedures (S2) and  $^1\text{H}/^{13}\text{C}$  NMR spectra of compounds **1-13** (S3-S28)

**General procedures:** Unless otherwise stated, all reactions were carried out in flame-dried glassware under a dry argon atmosphere. All solvents were purchased from Fisher and were dried prior to use. "Regular workup" was as follows: the reaction mixture was diluted with EtOAc, washed with water, 10% NaHCO<sub>3</sub> (aq), water and brine, the organic layer was dried over anhydrous Na<sub>2</sub>SO<sub>4</sub> and then filtered and concentrated under reduced pressure to yield the crude product. The chemical shift assignments for major diastereomers (not minor diastereomers) were reported.

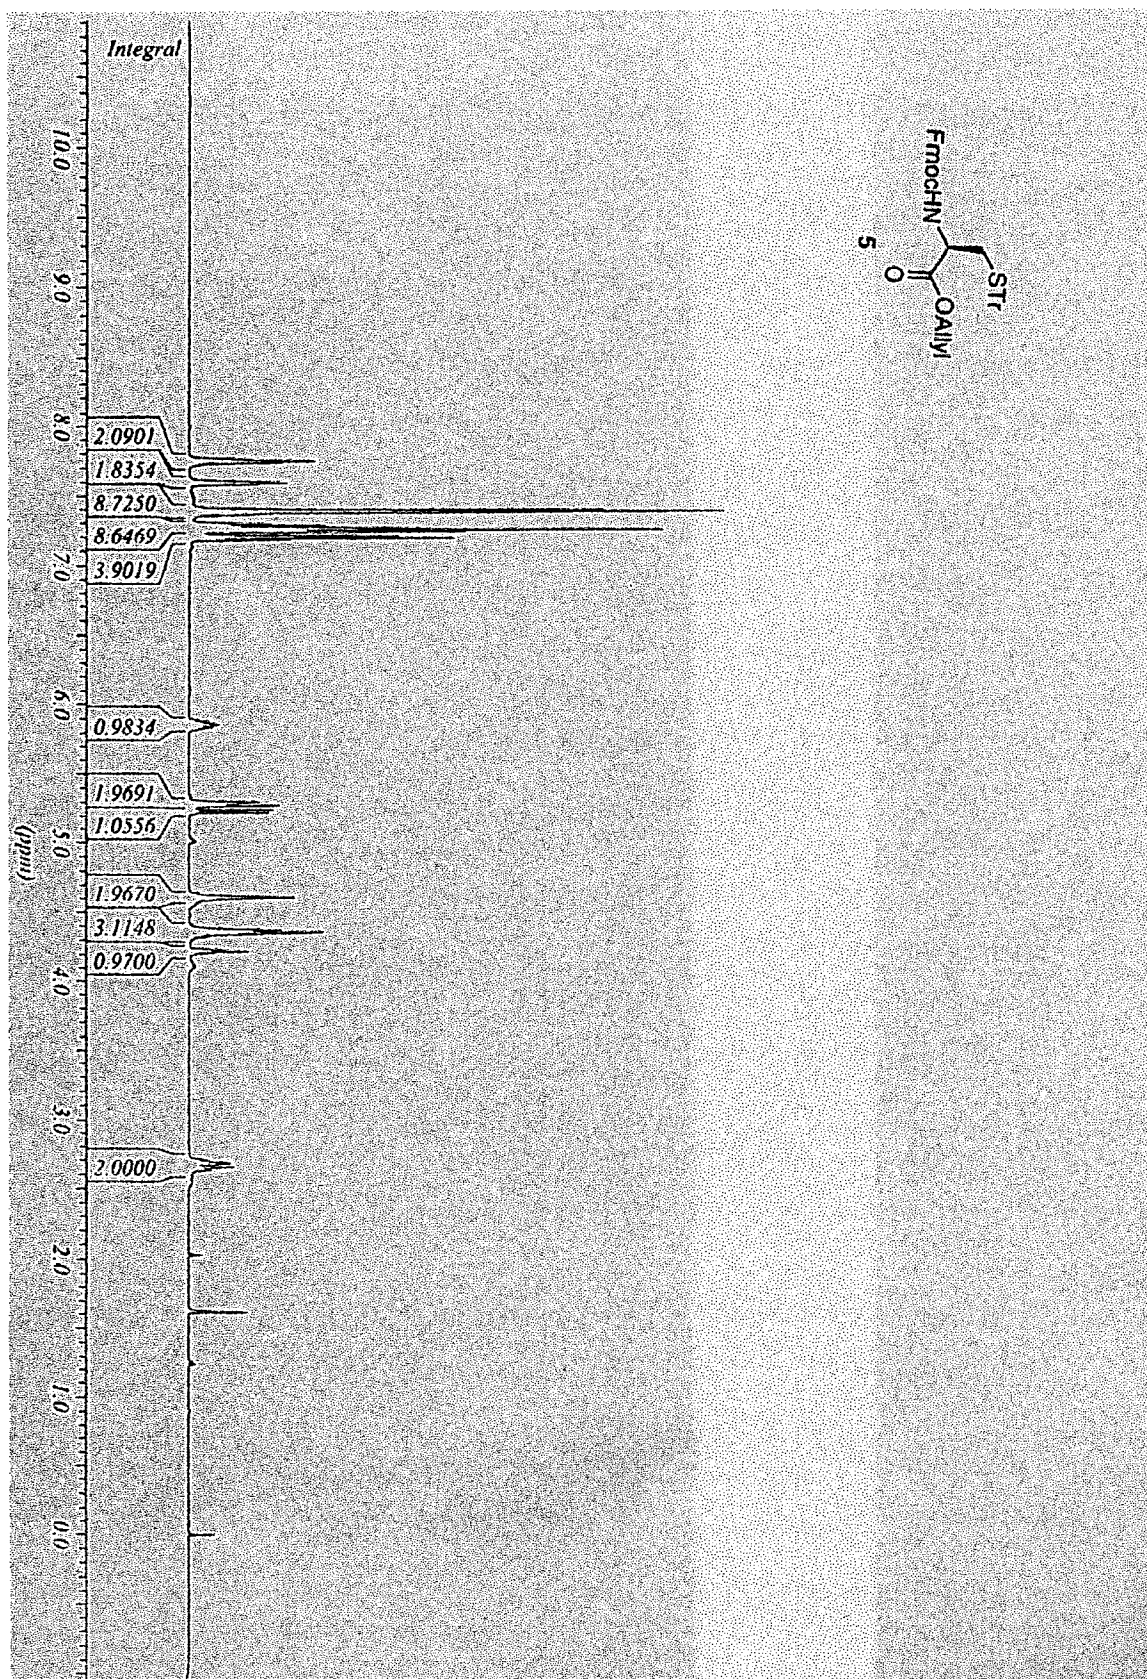

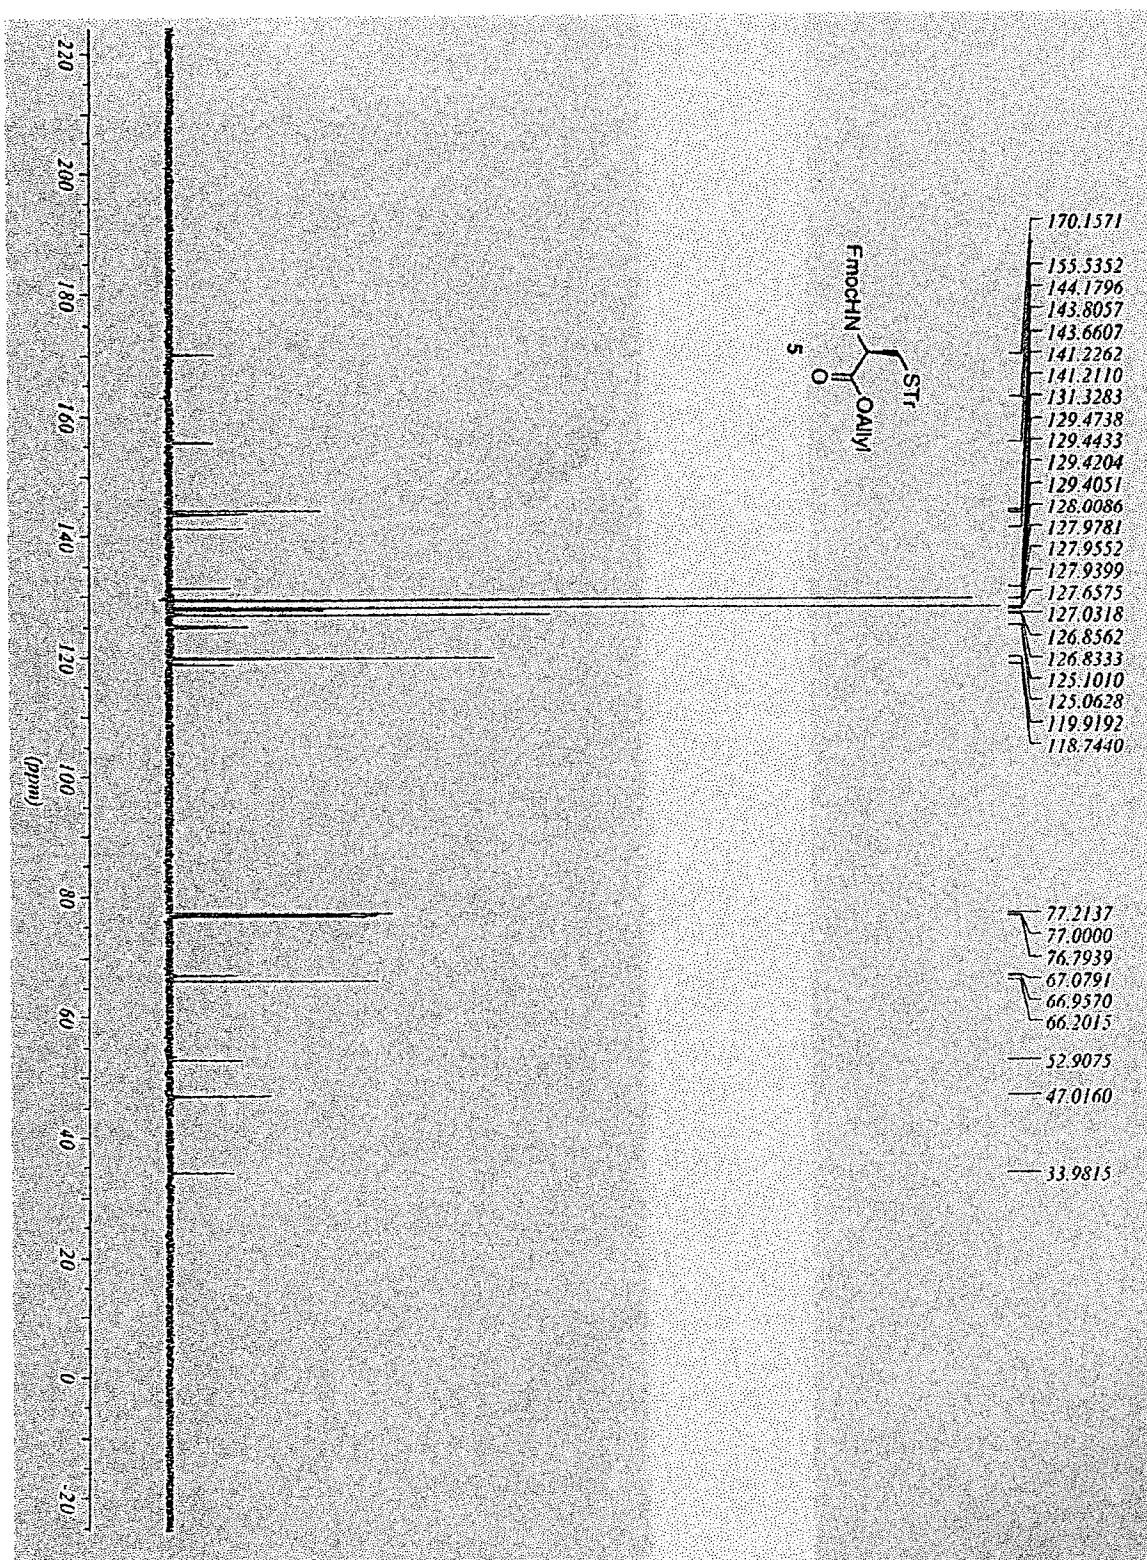



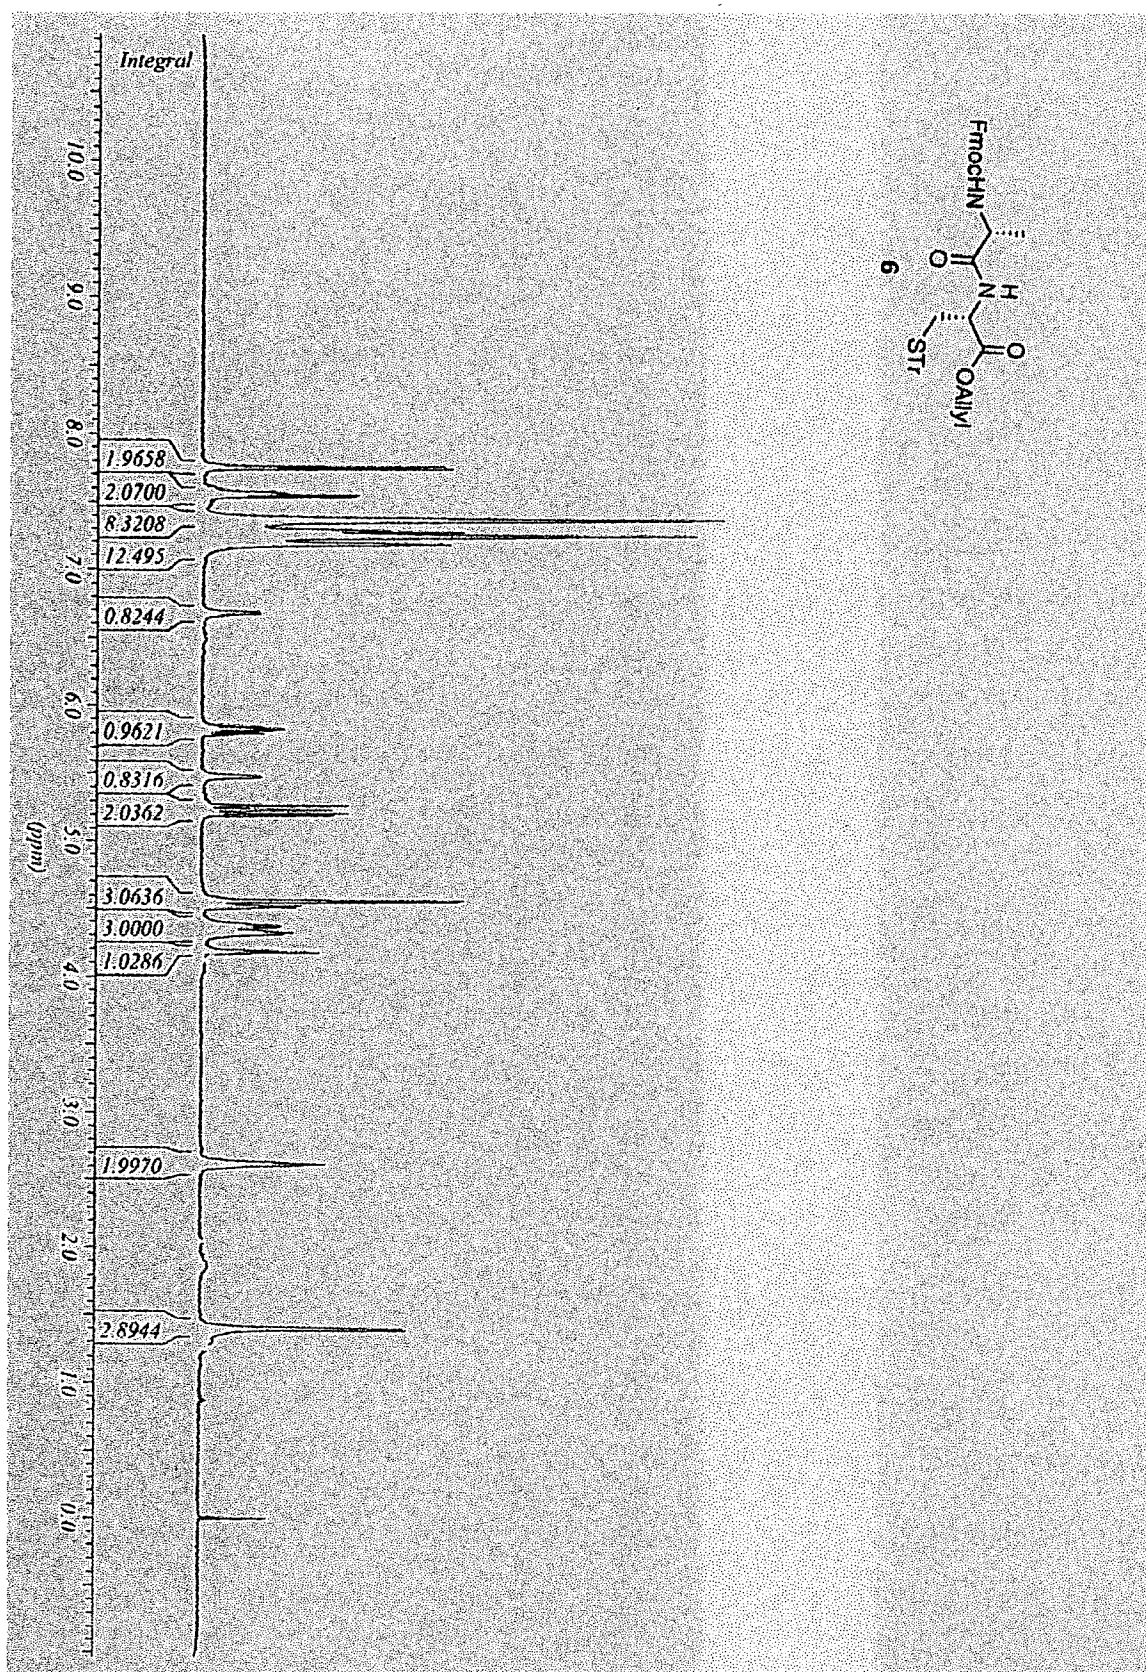

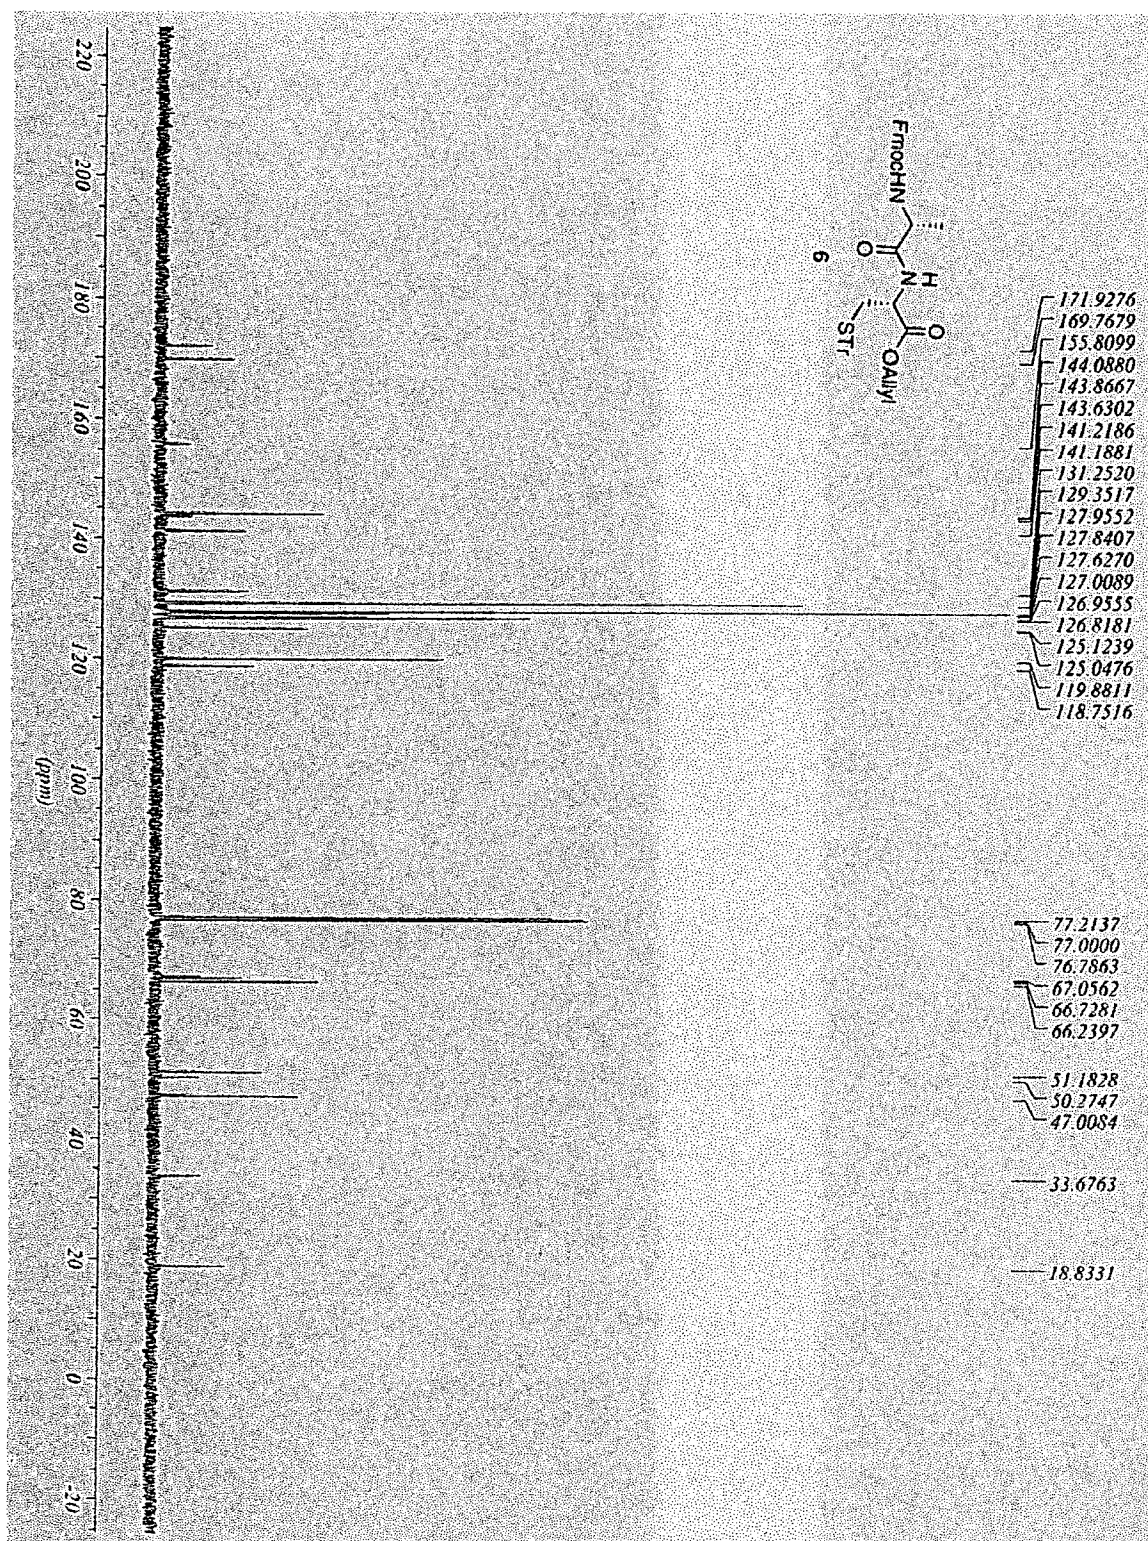

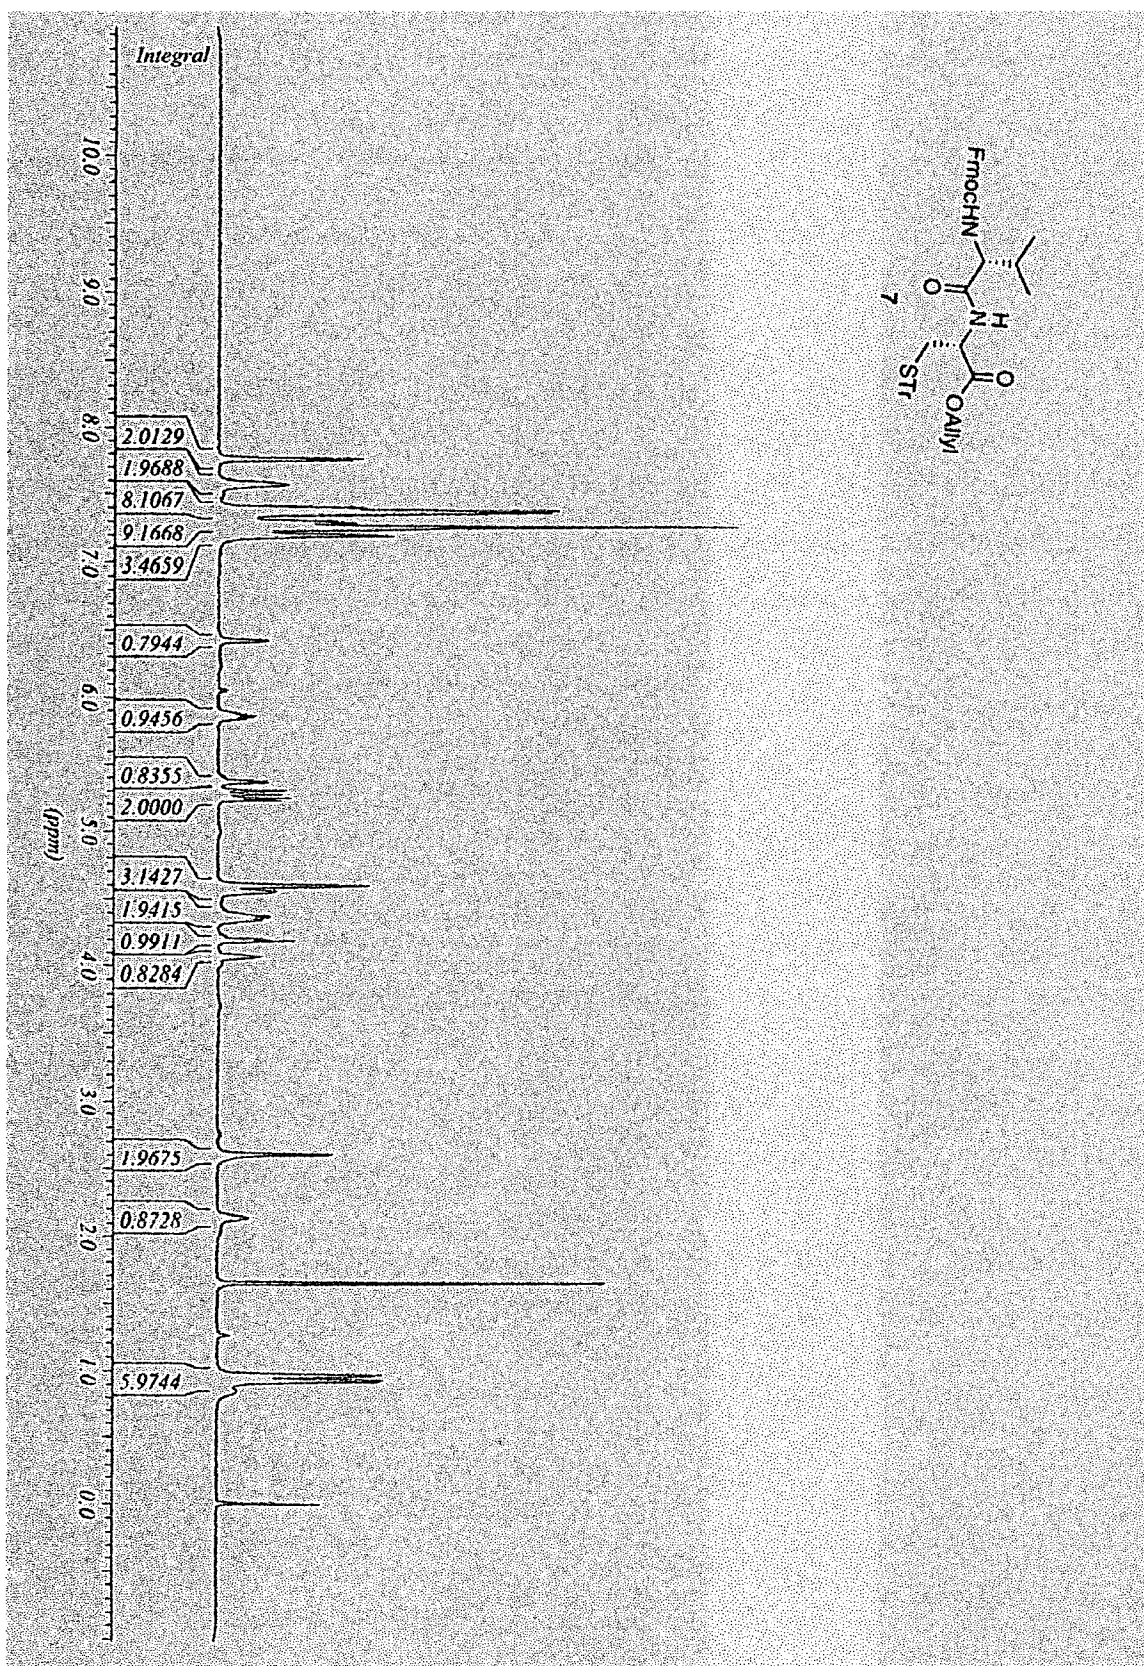



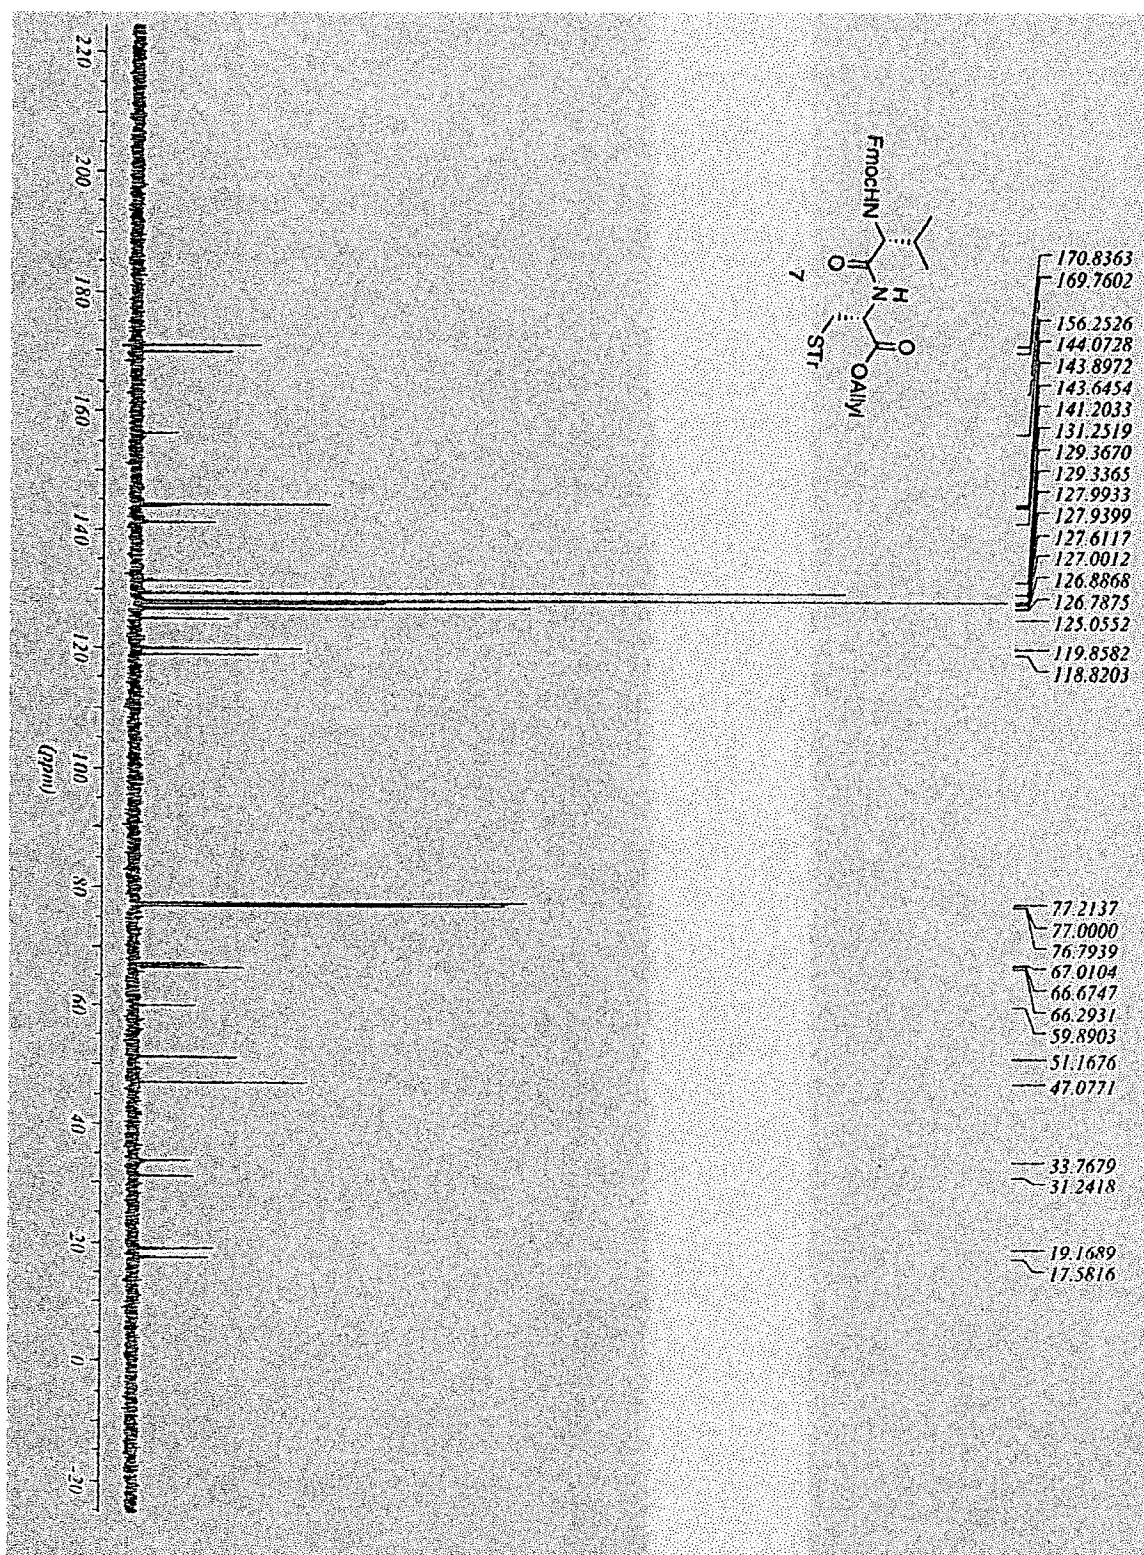

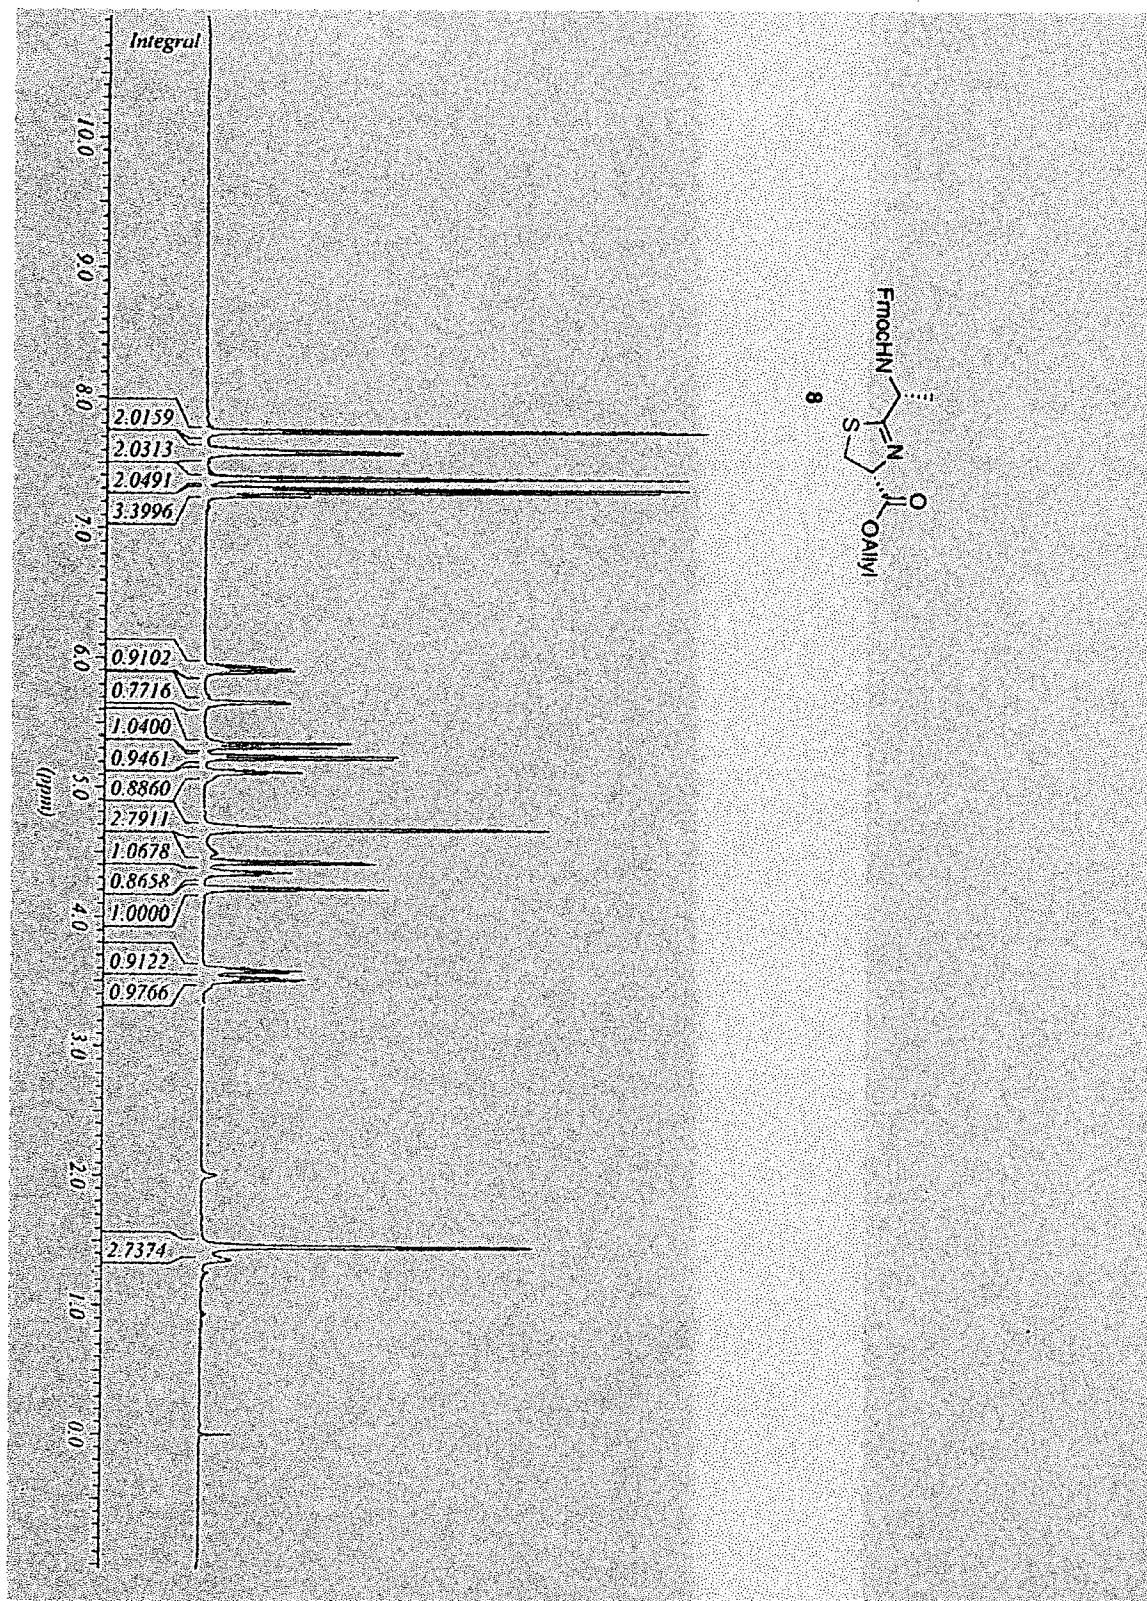



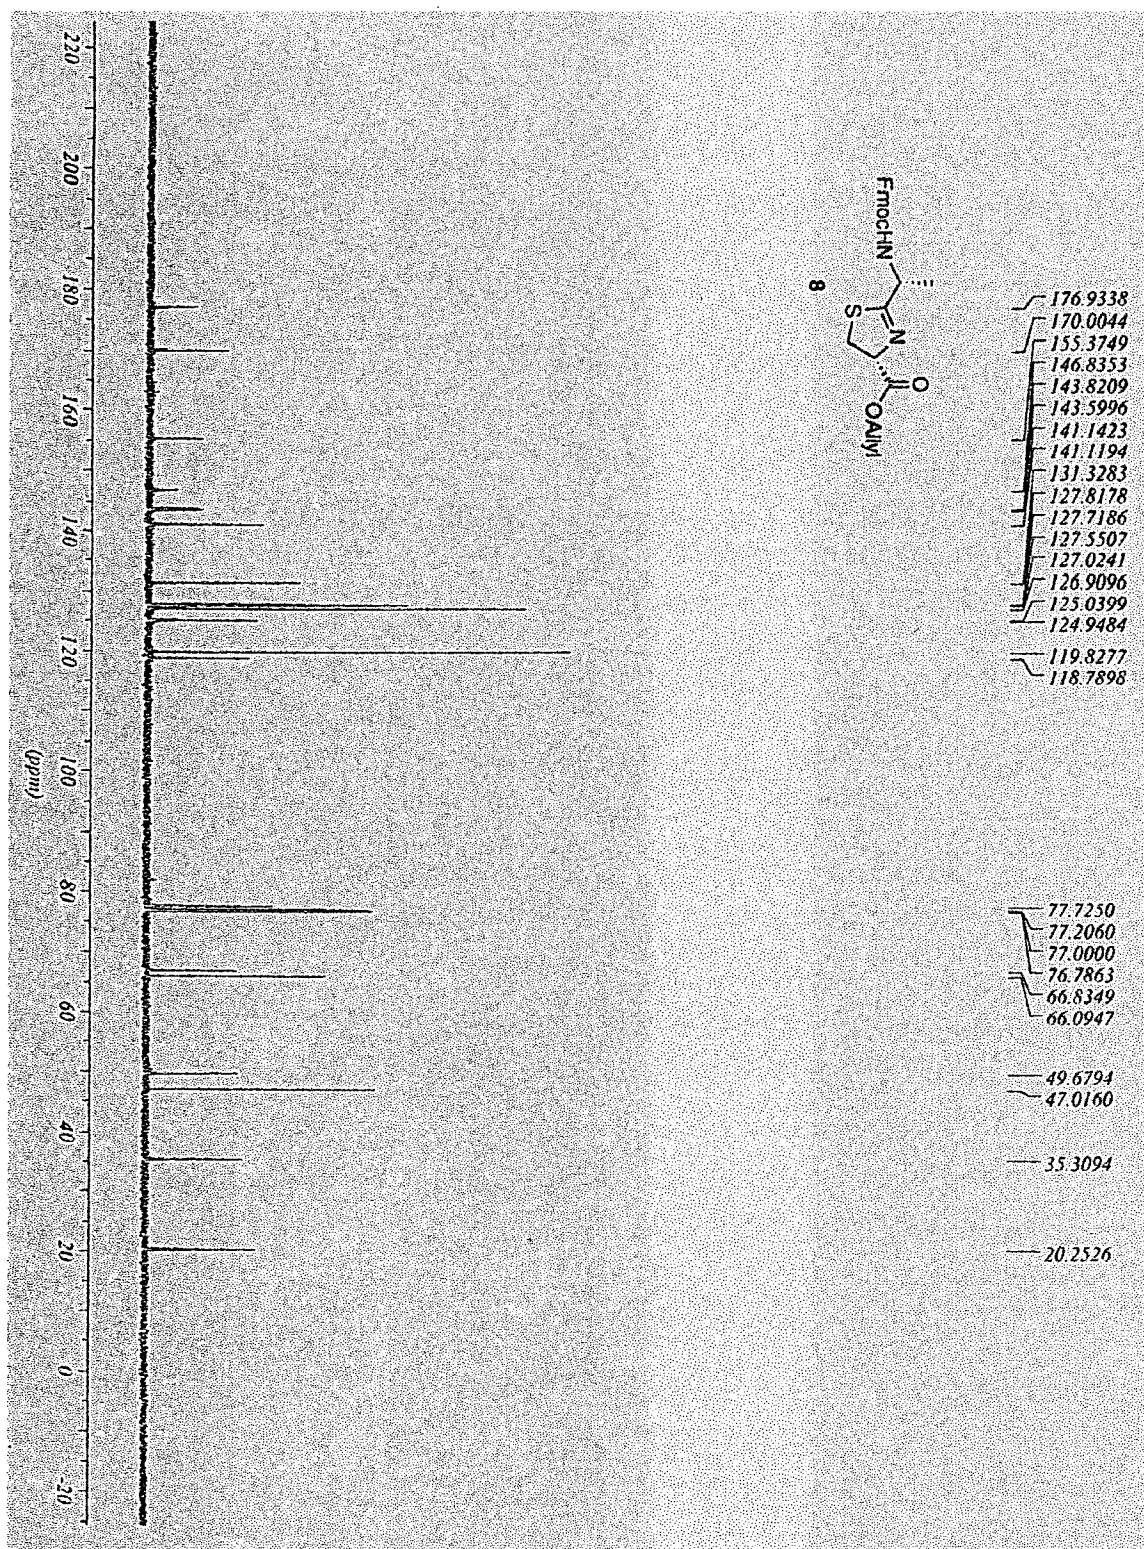

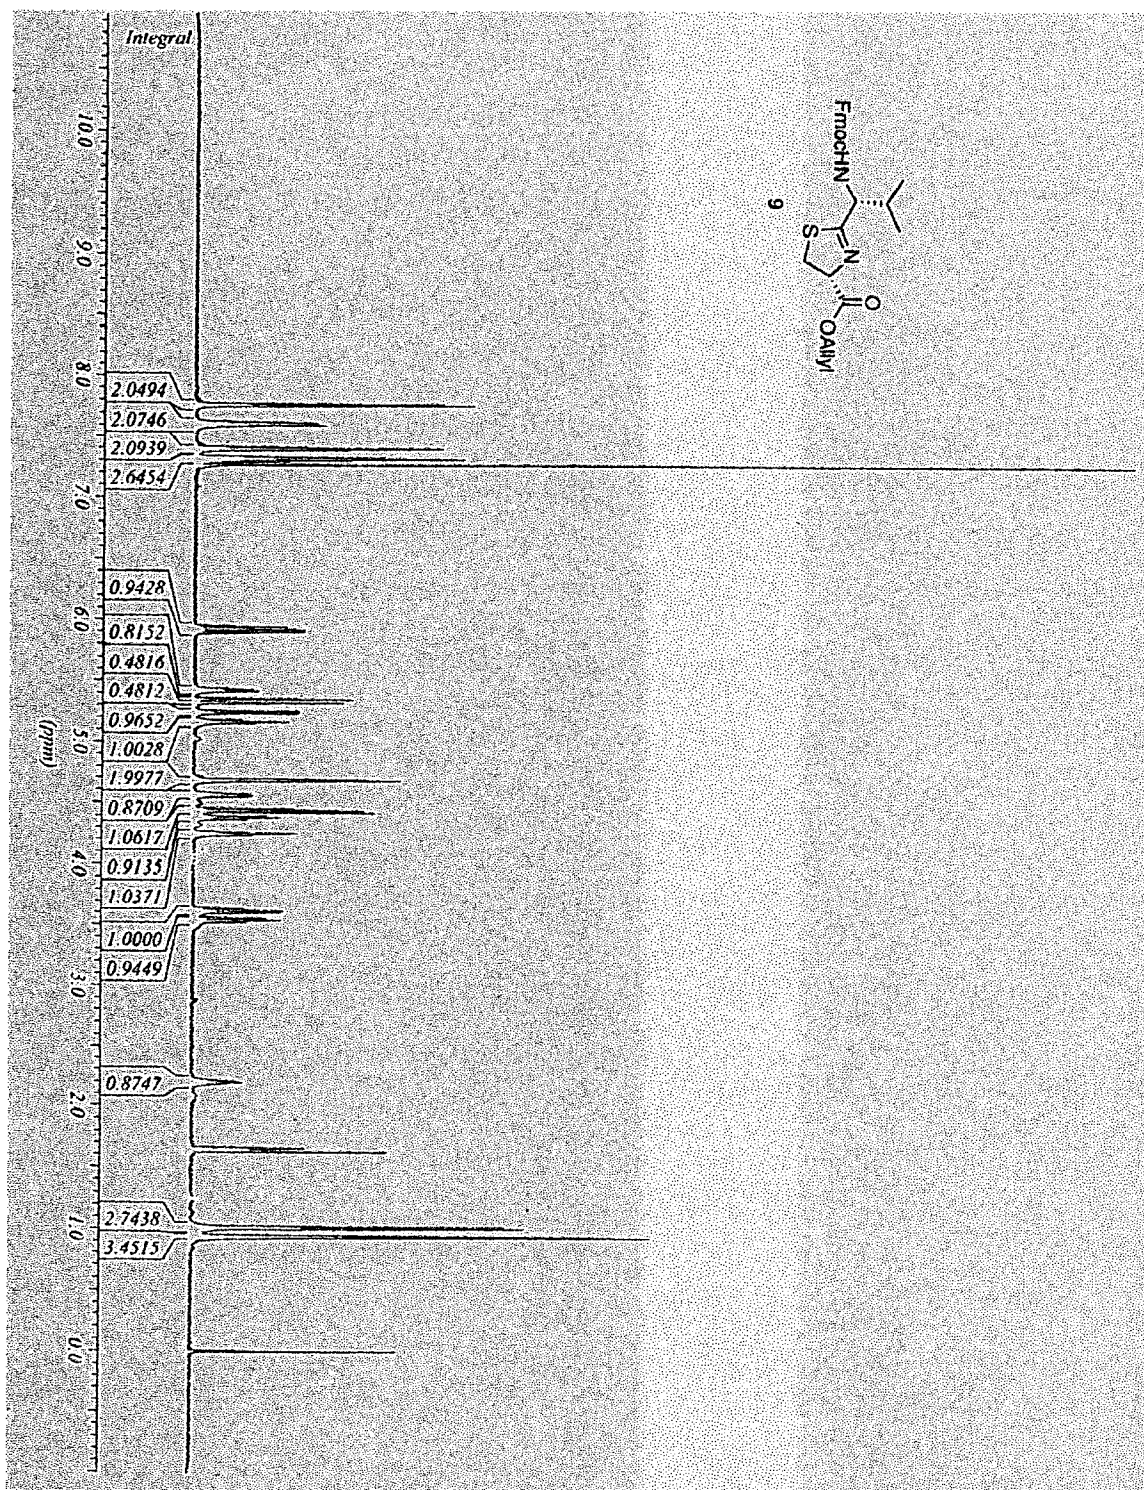

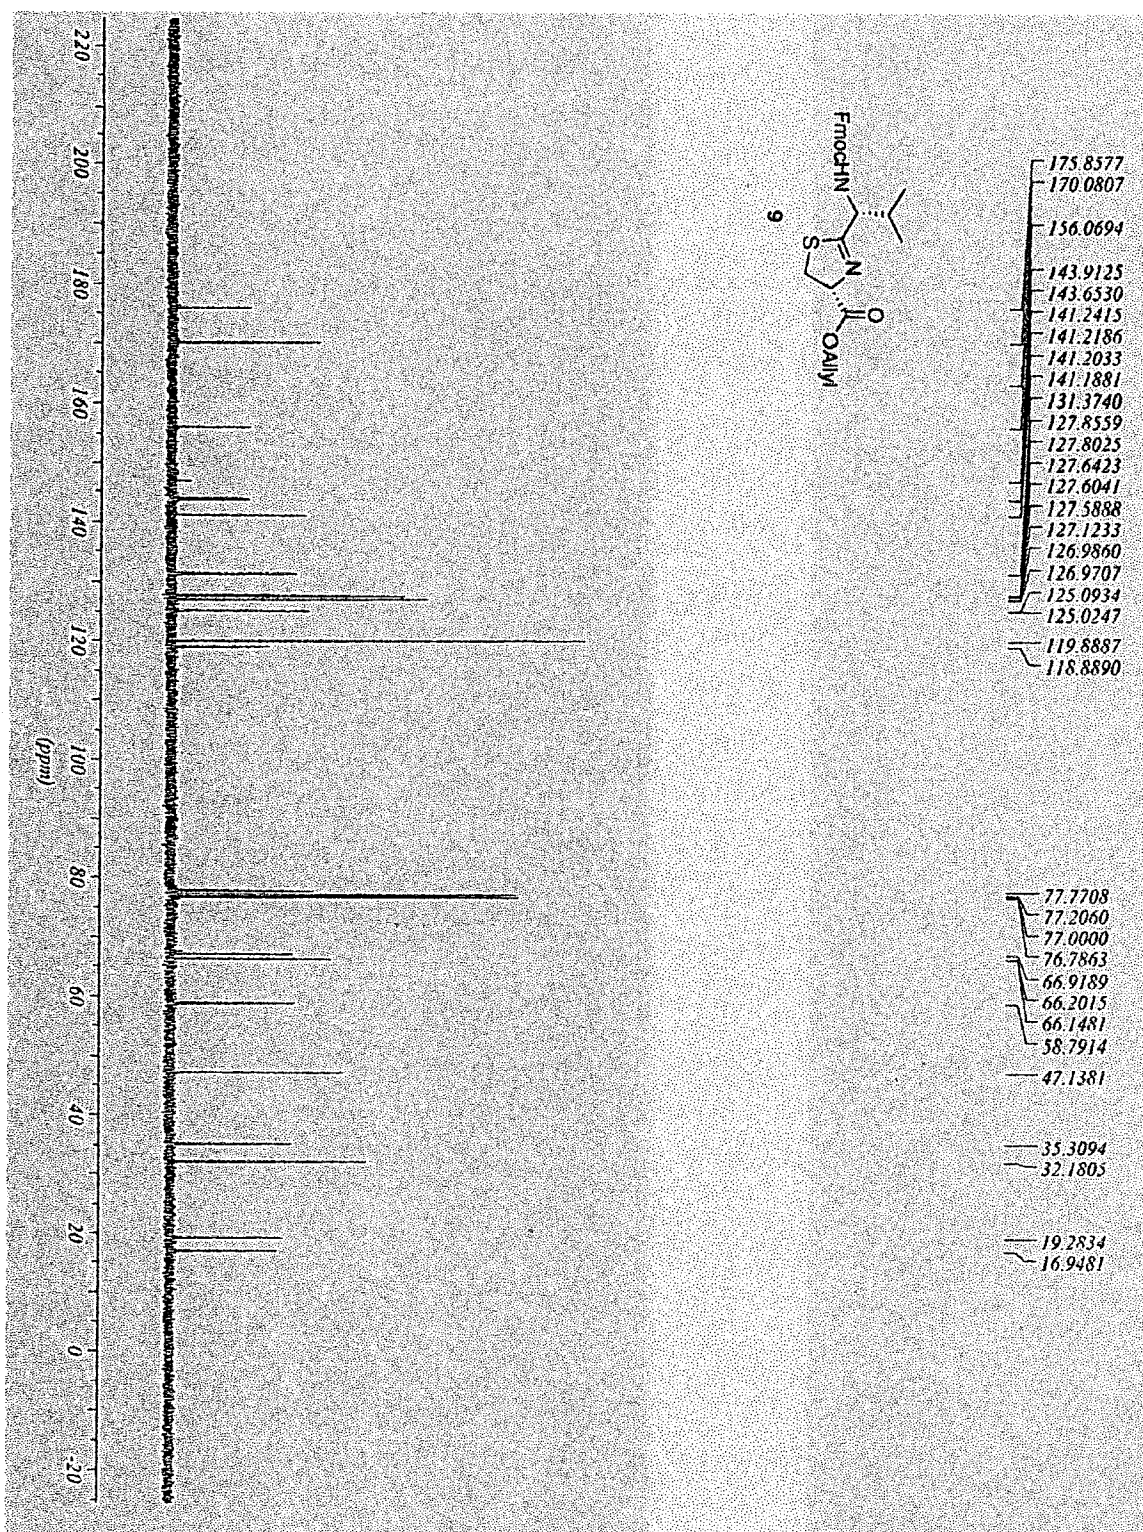



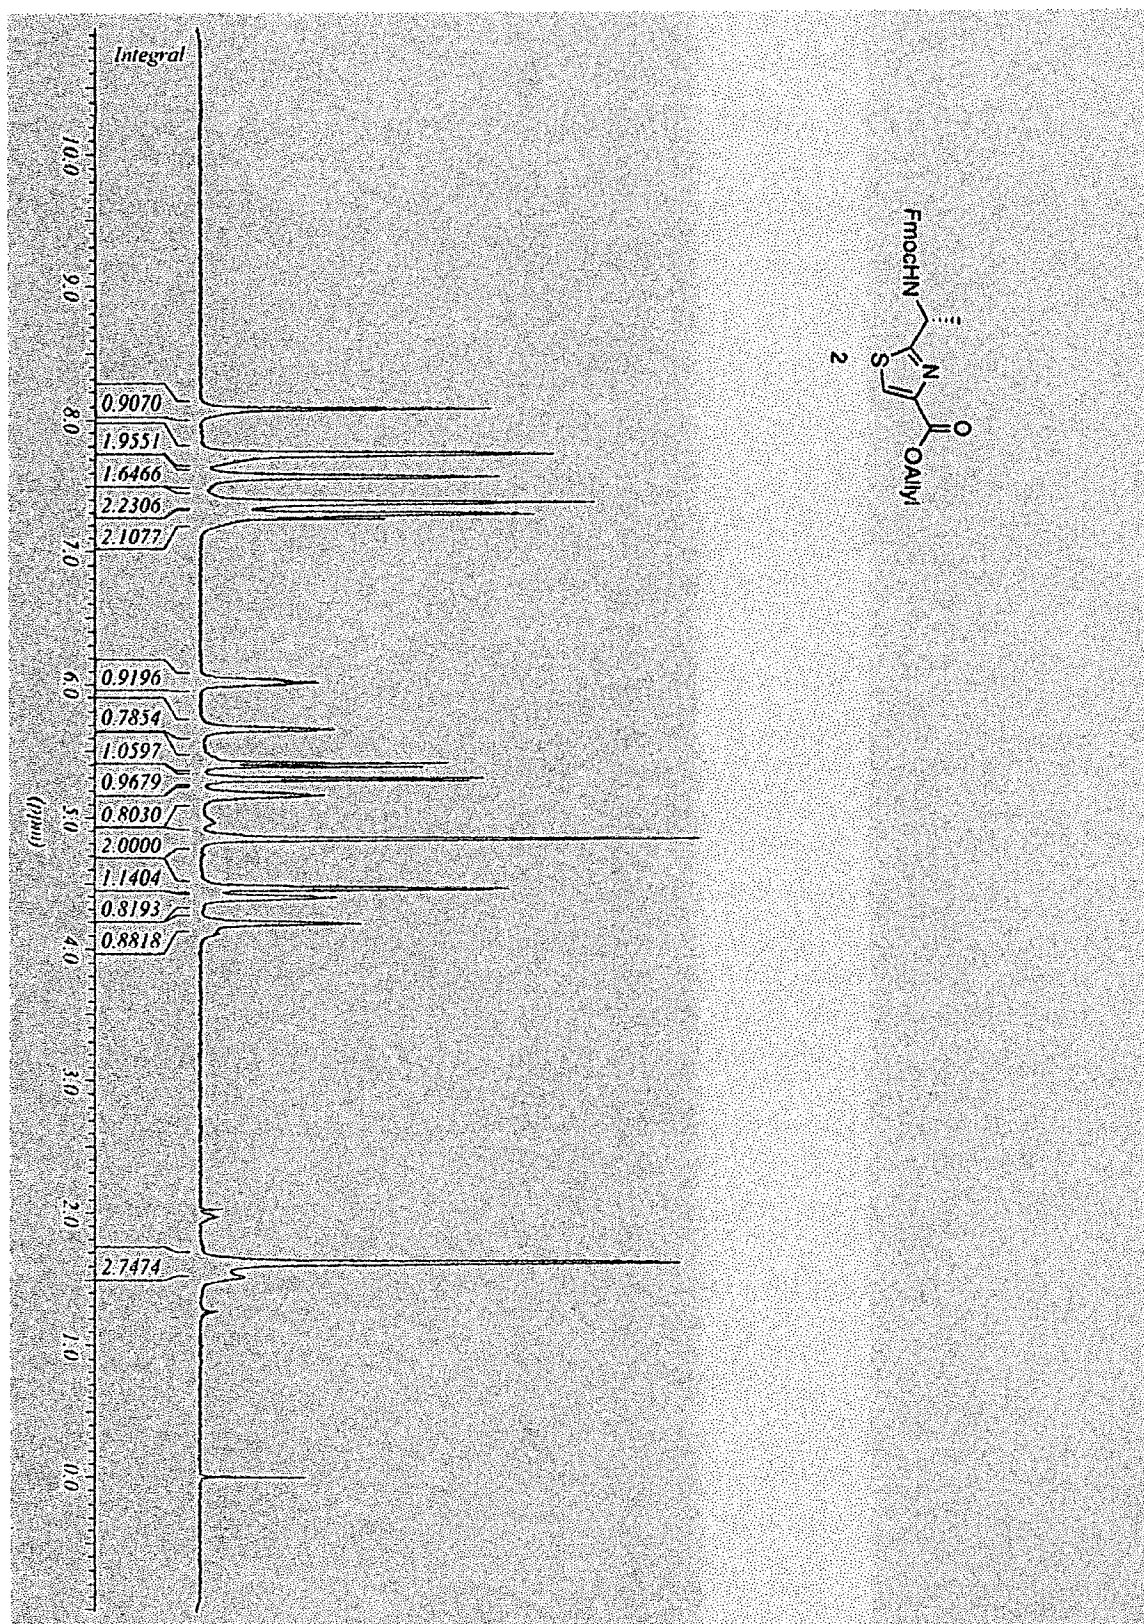

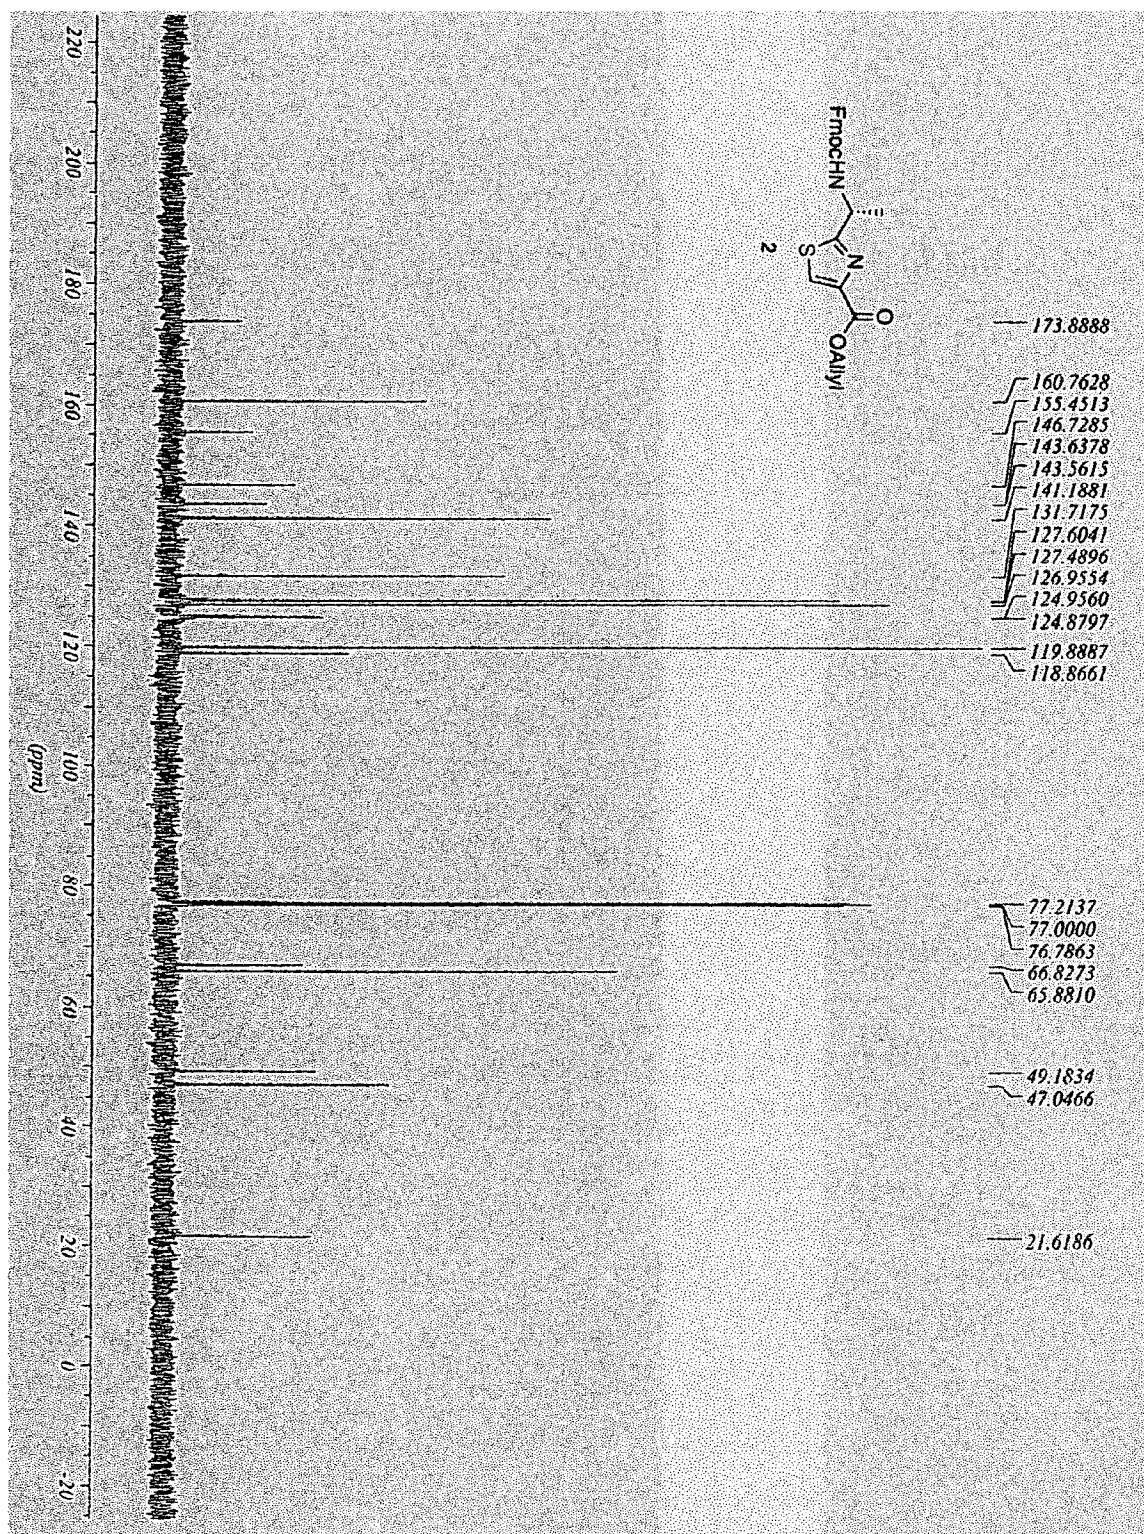



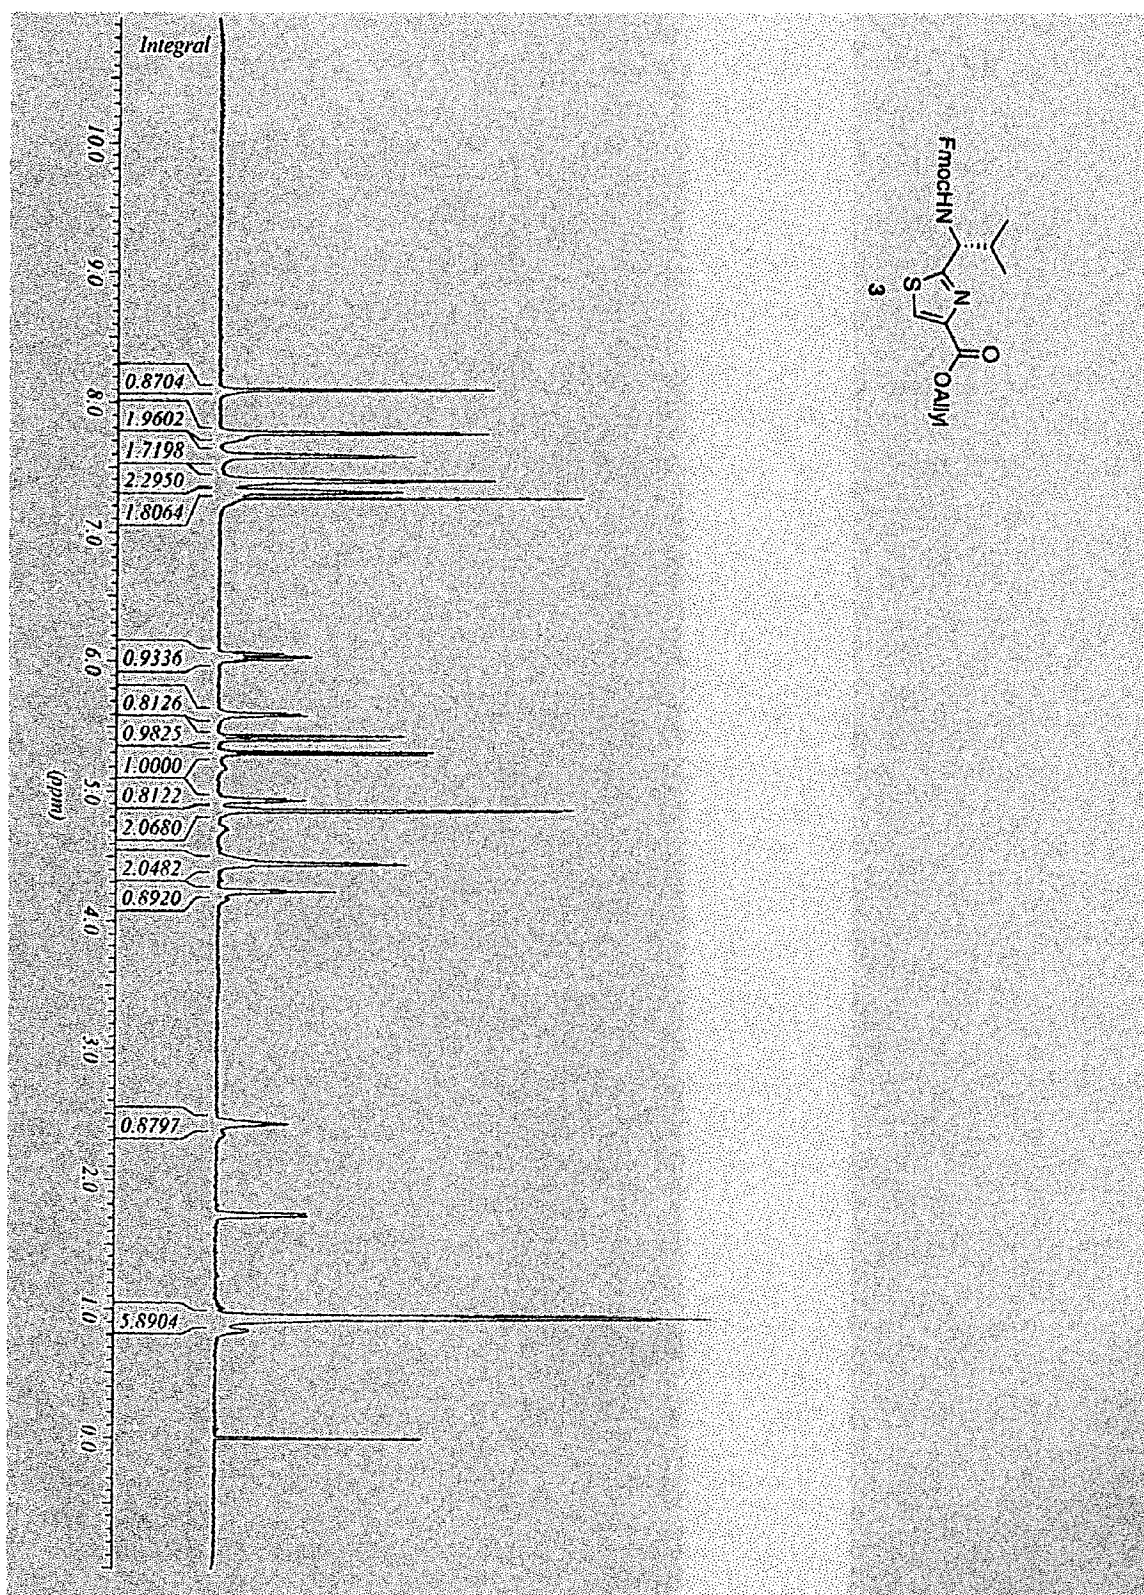

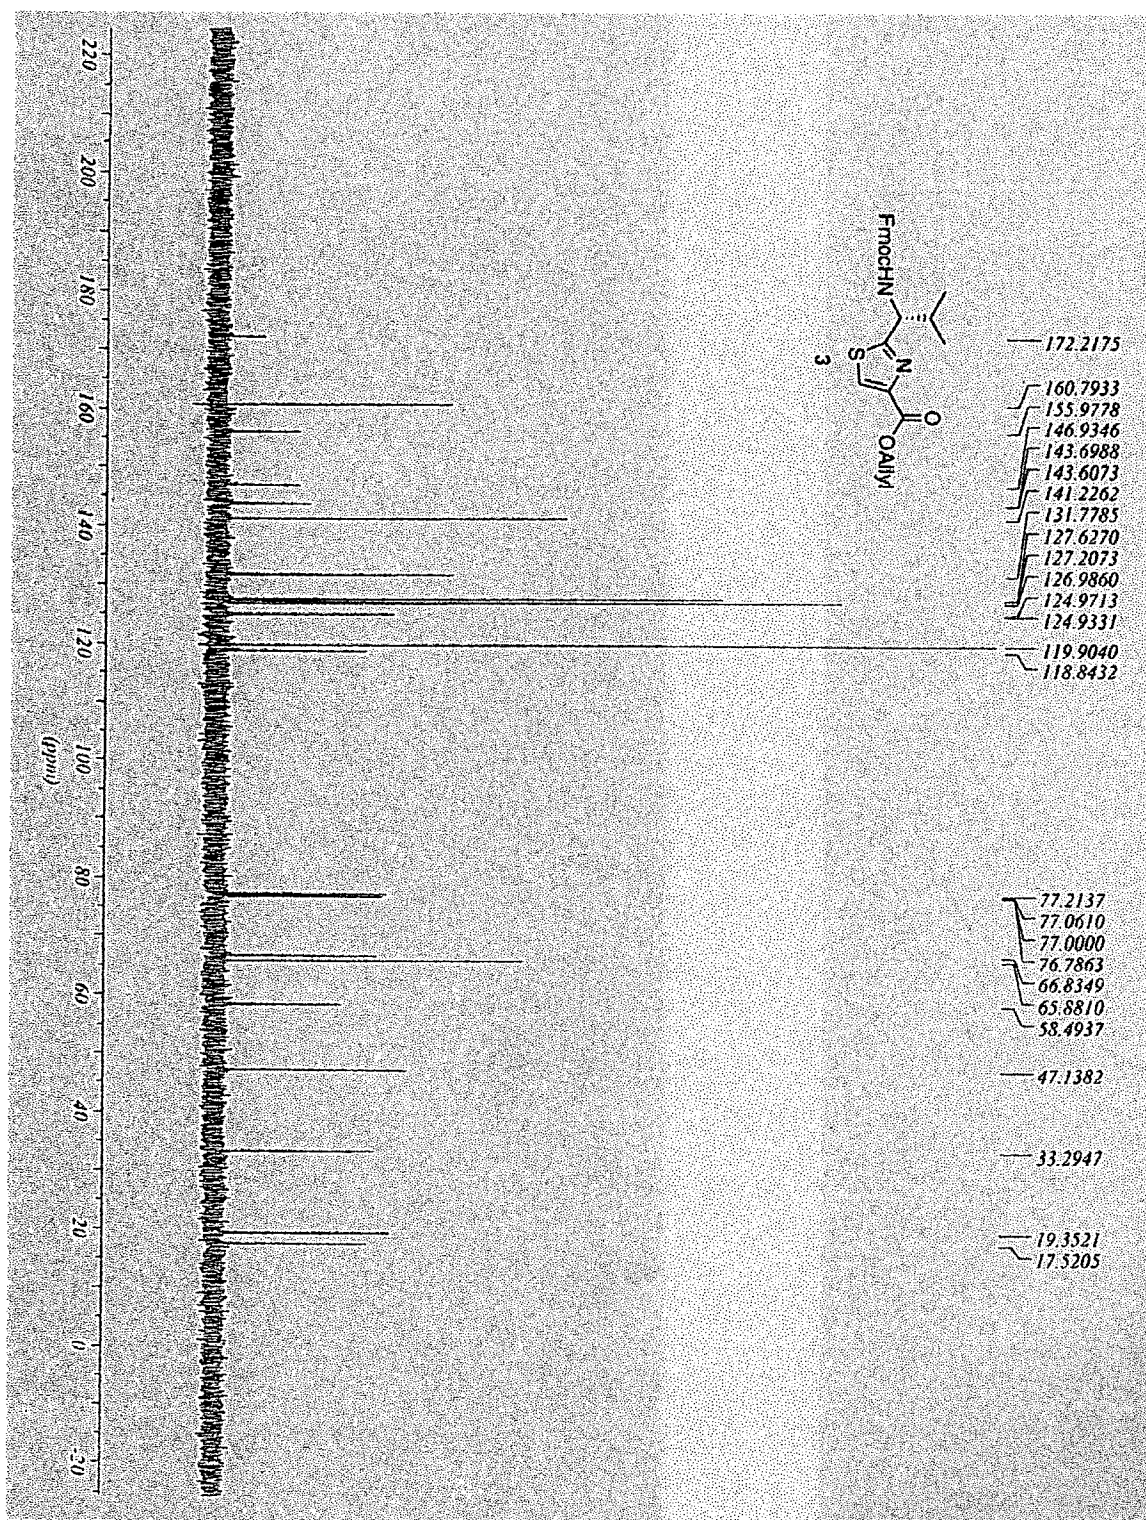

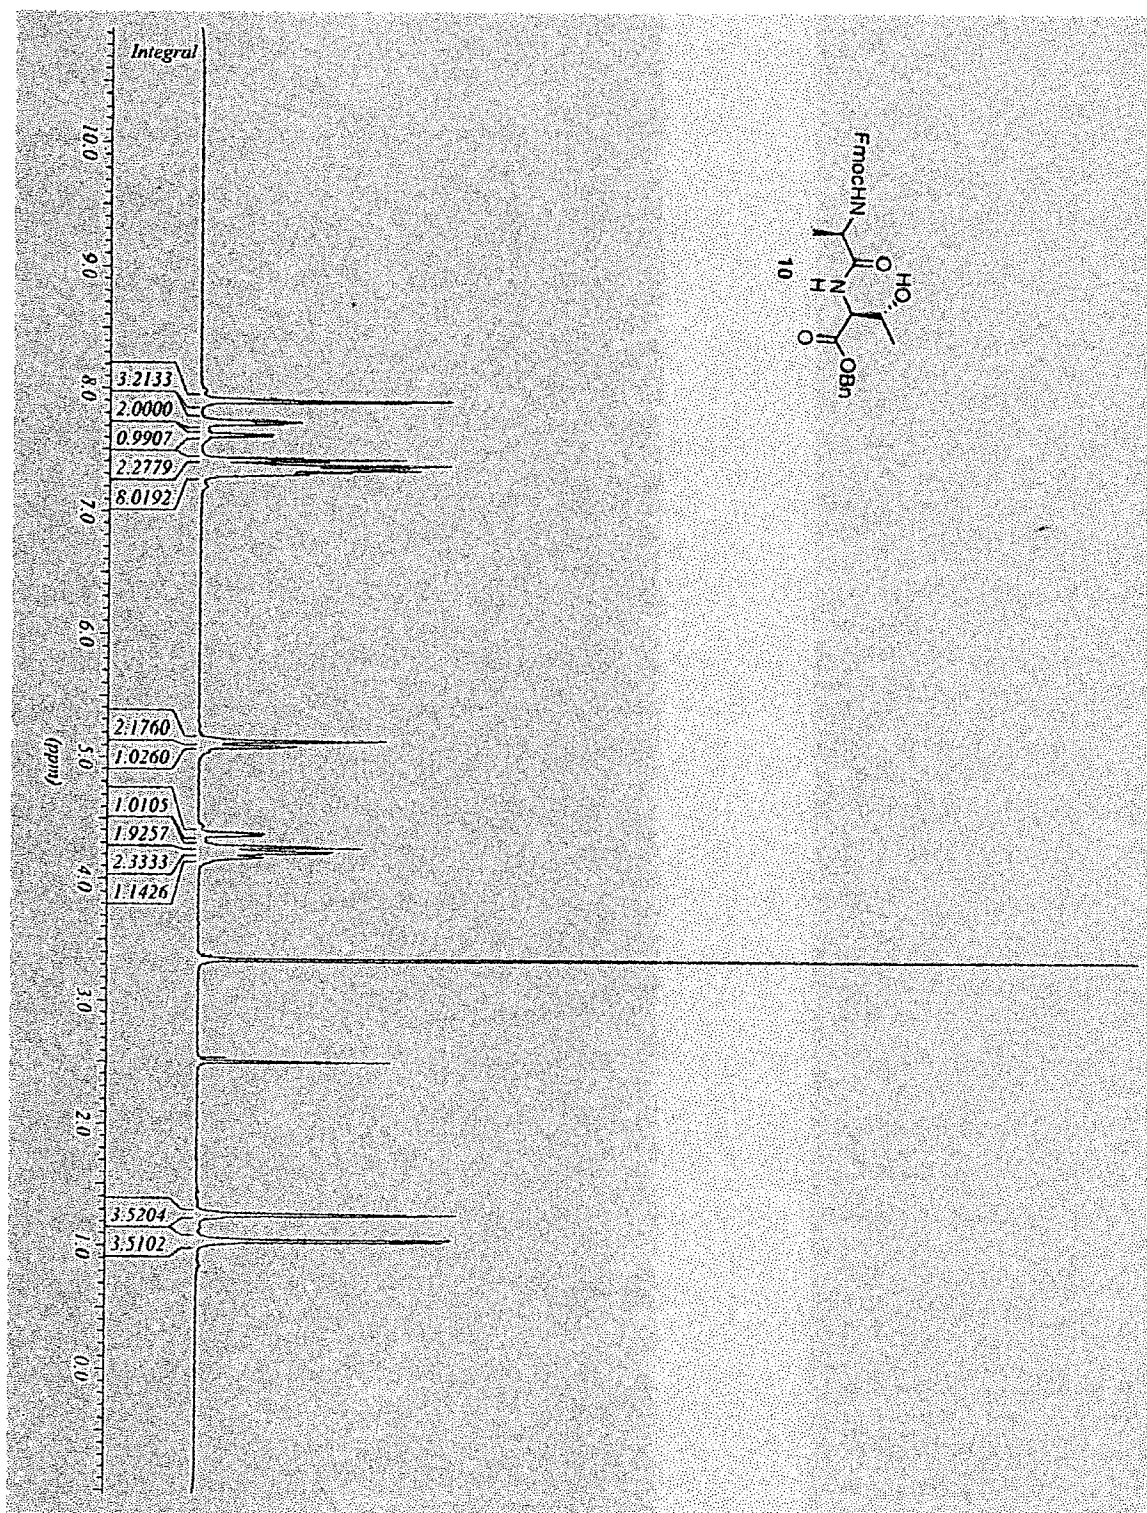



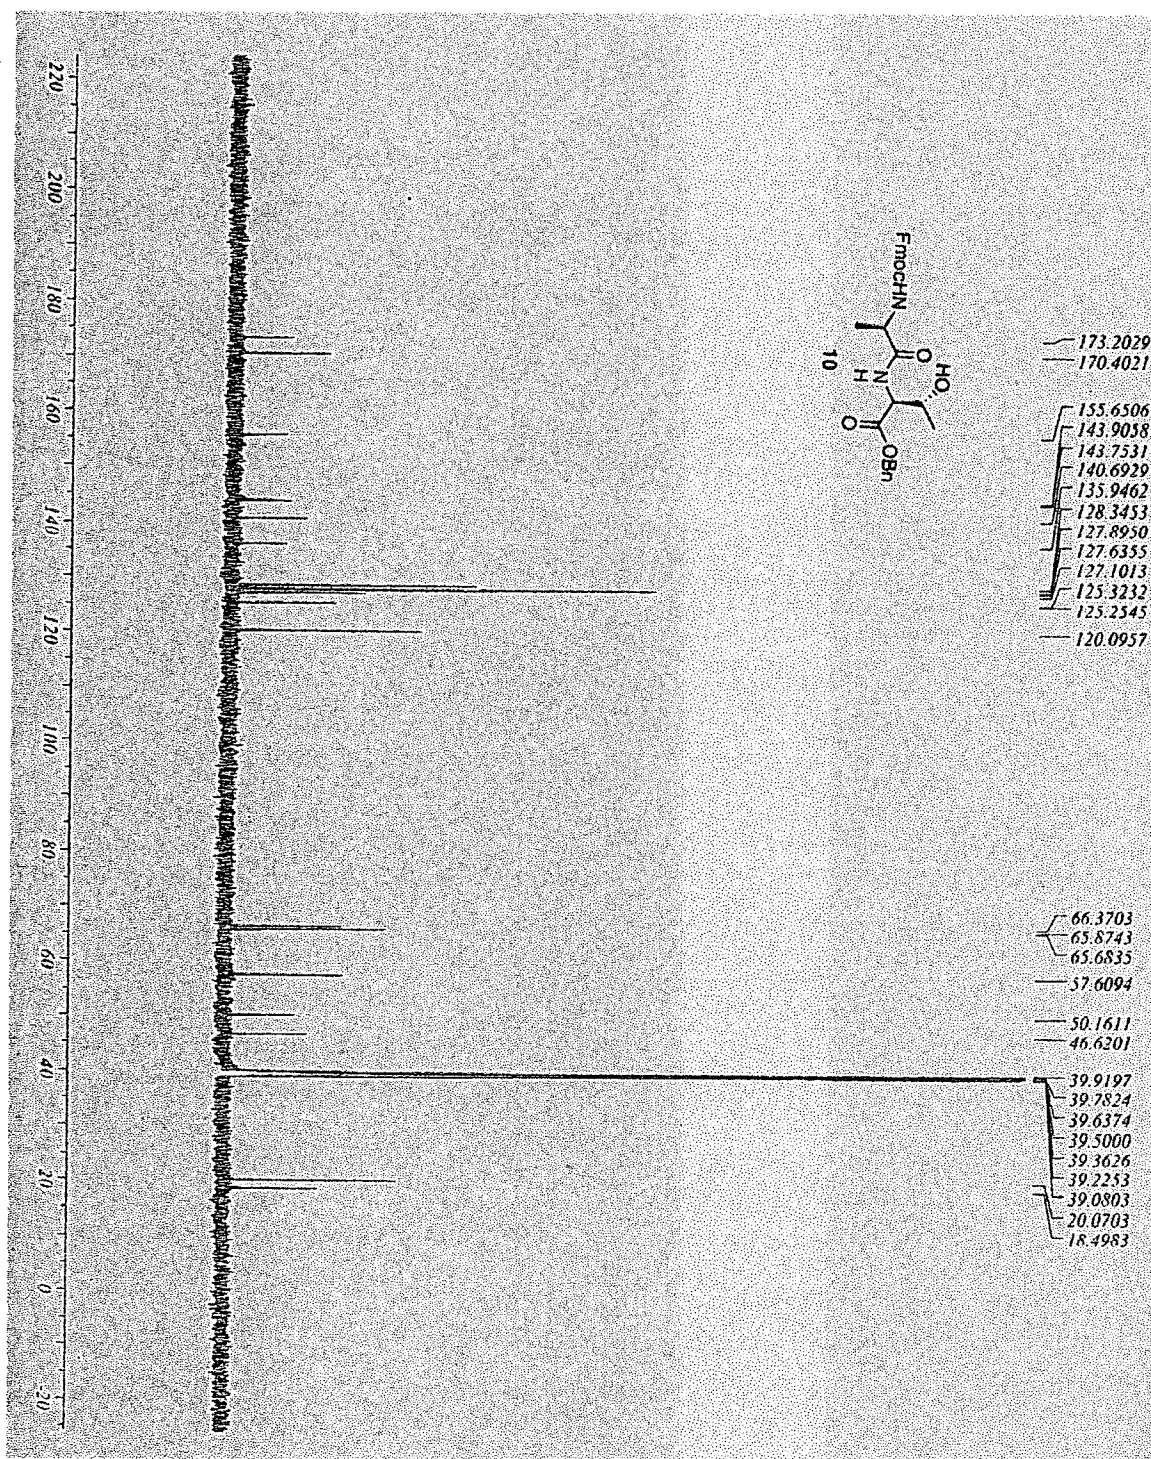

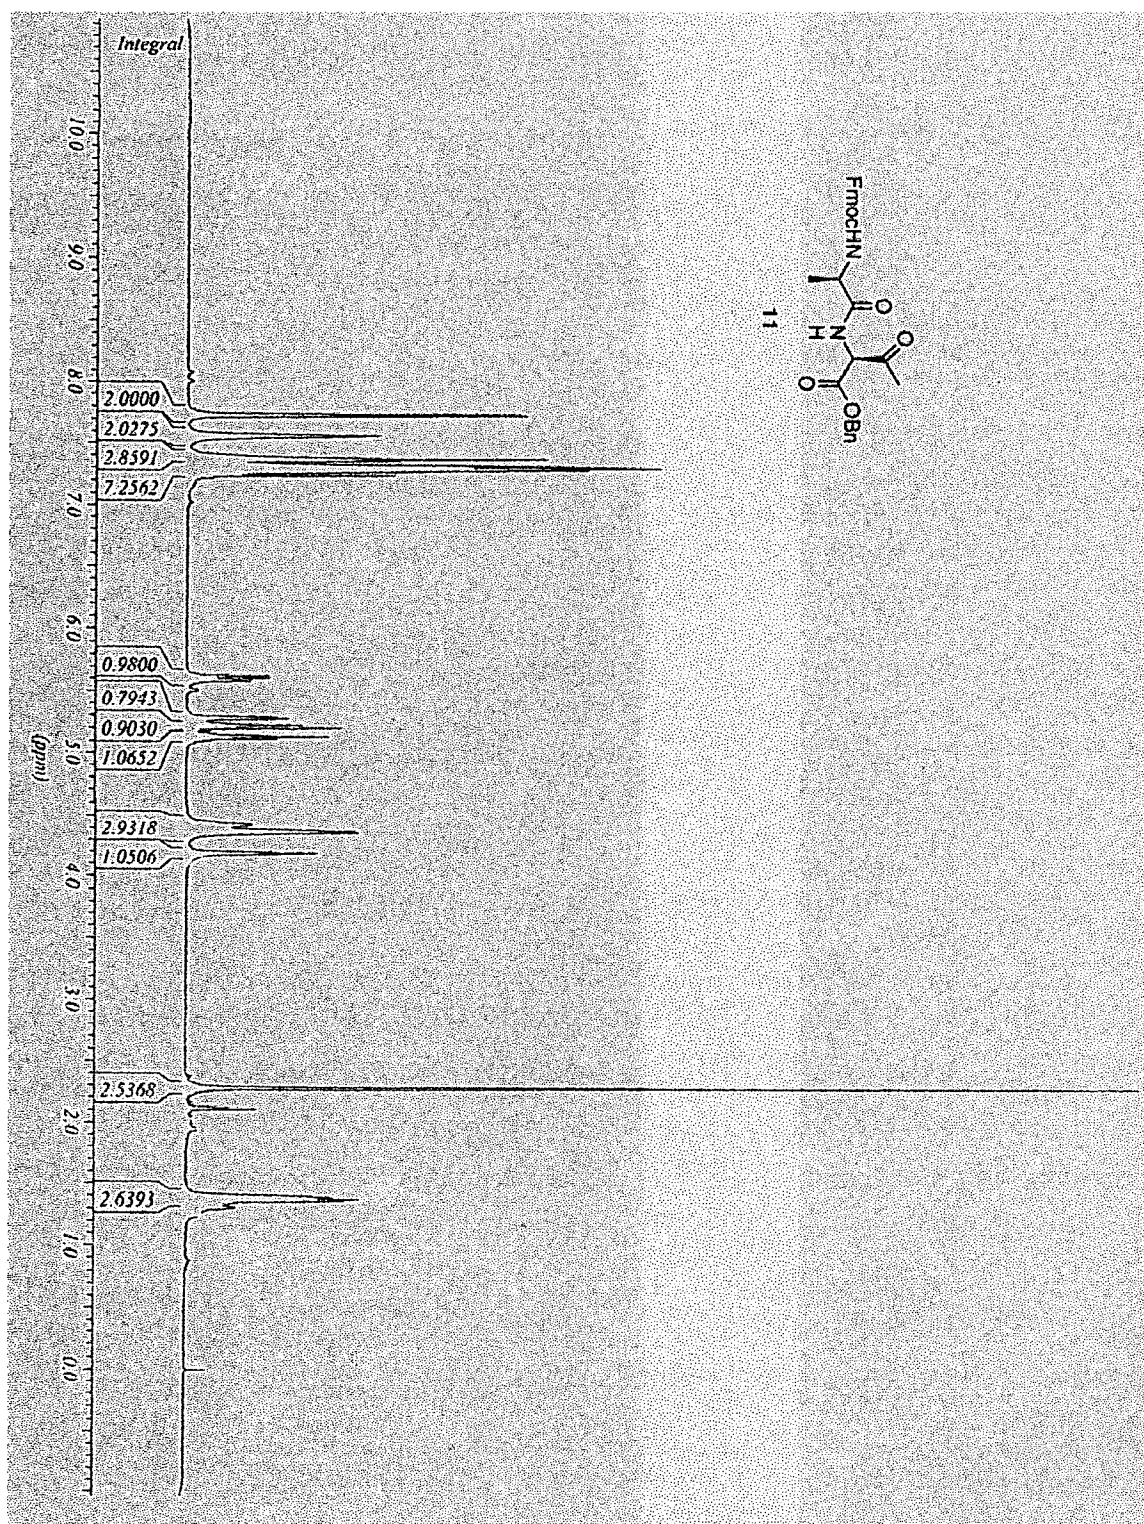



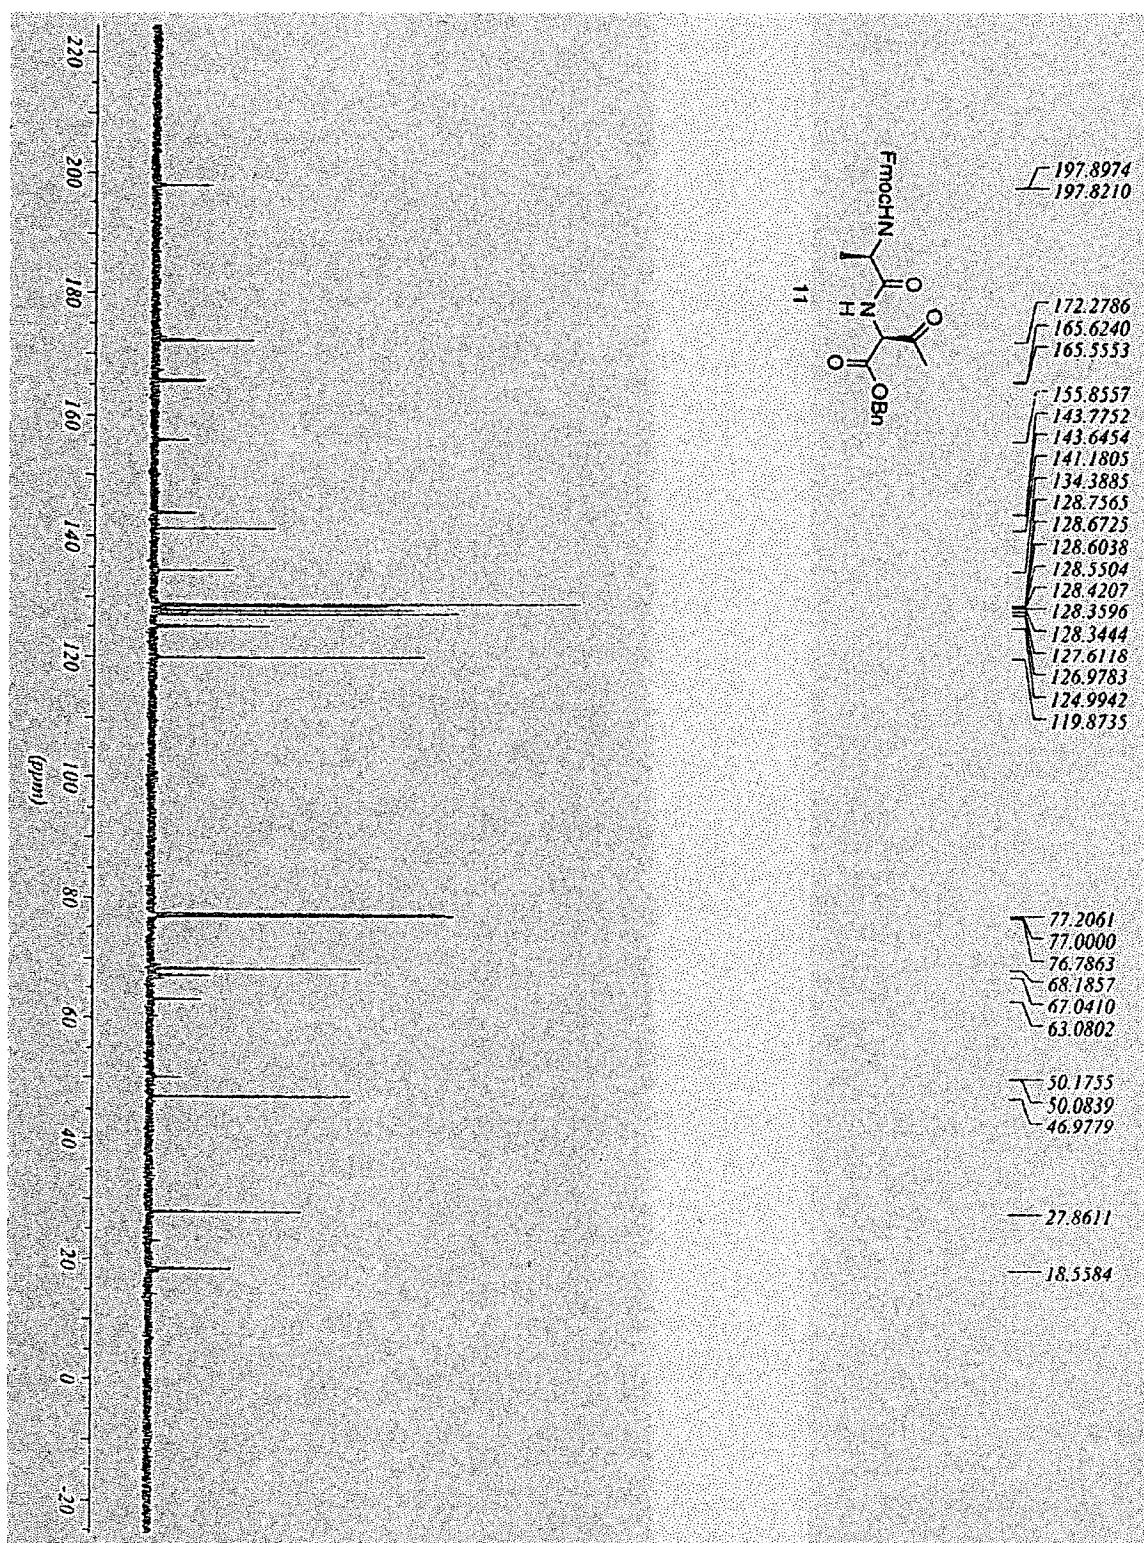

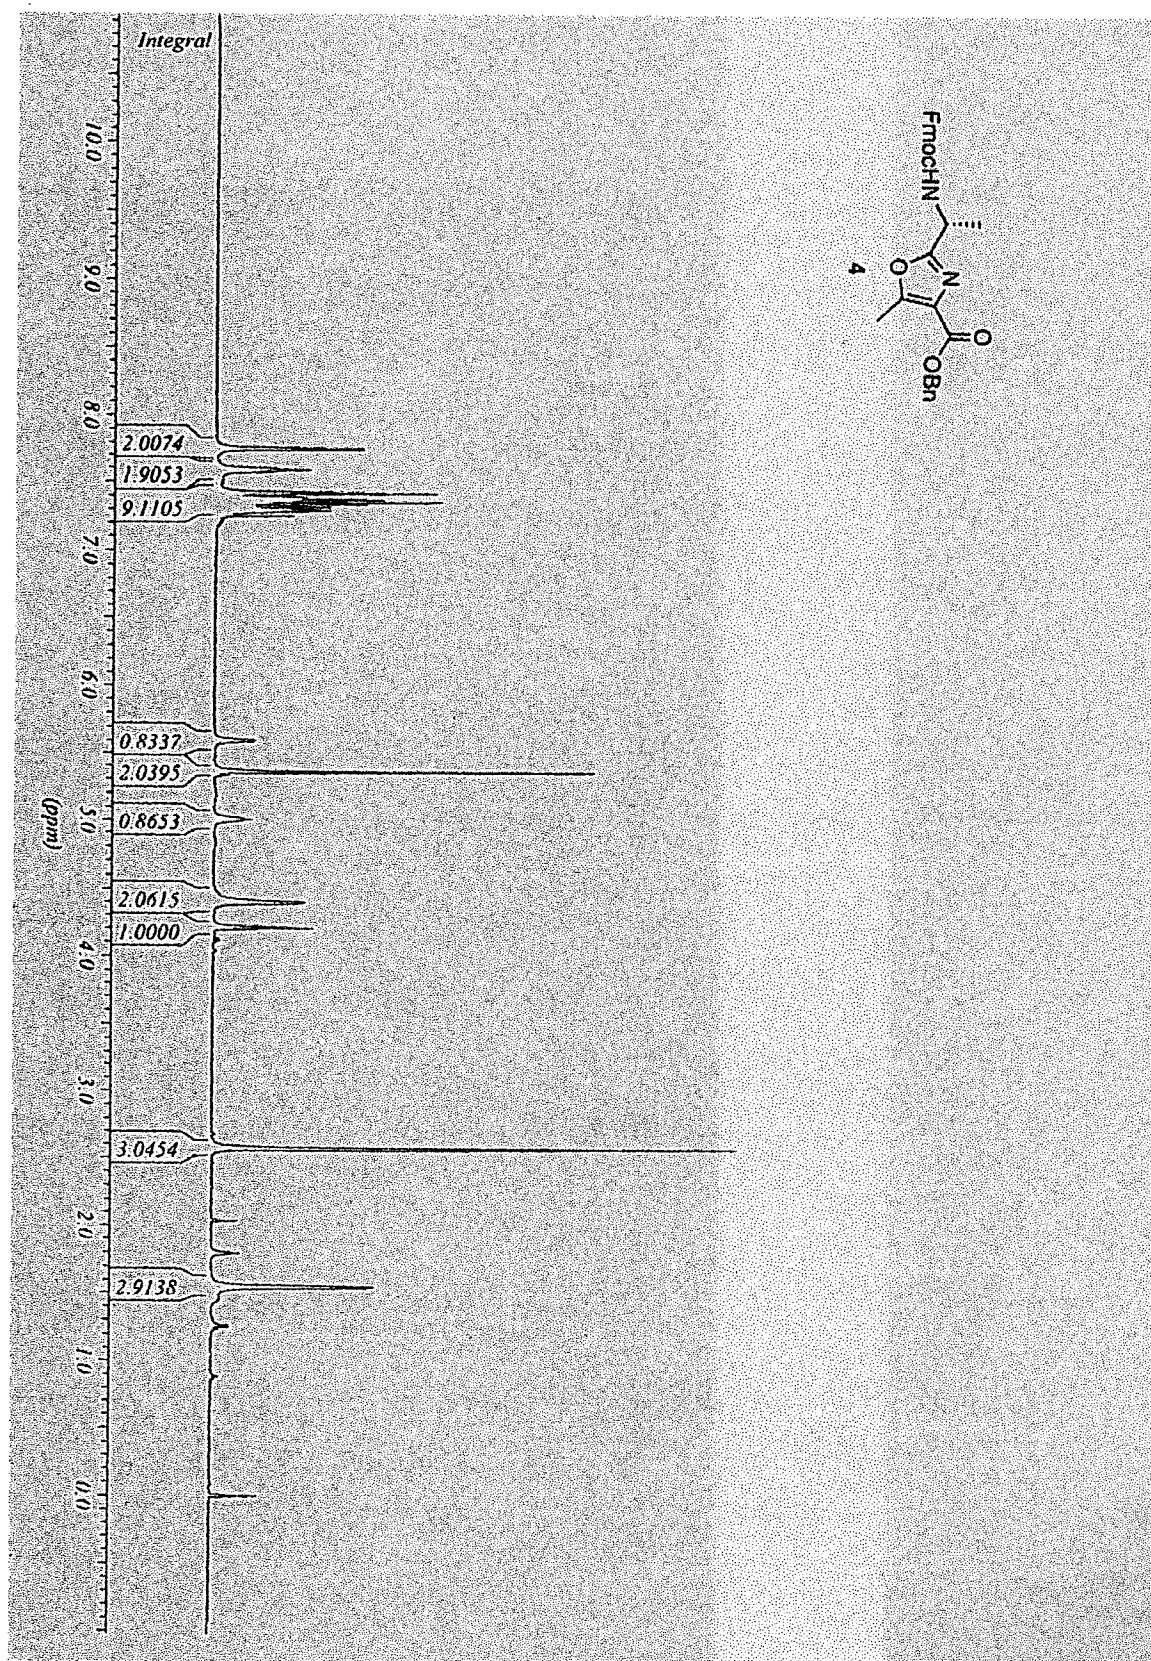

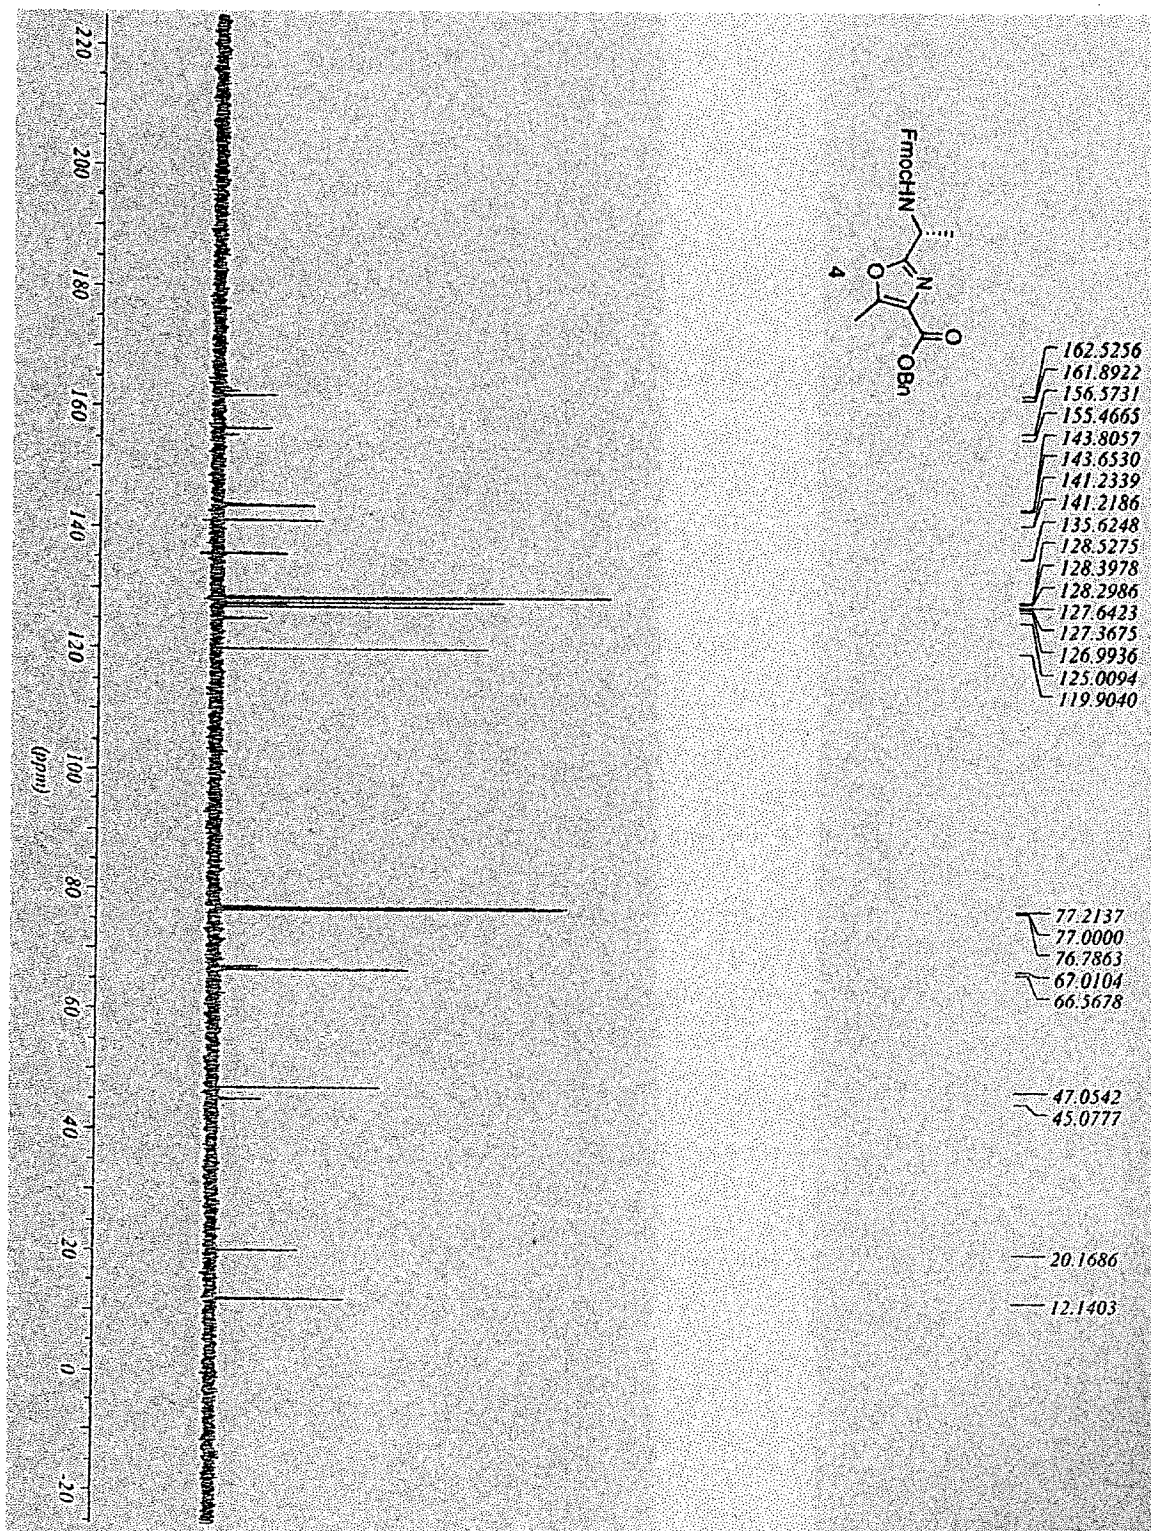



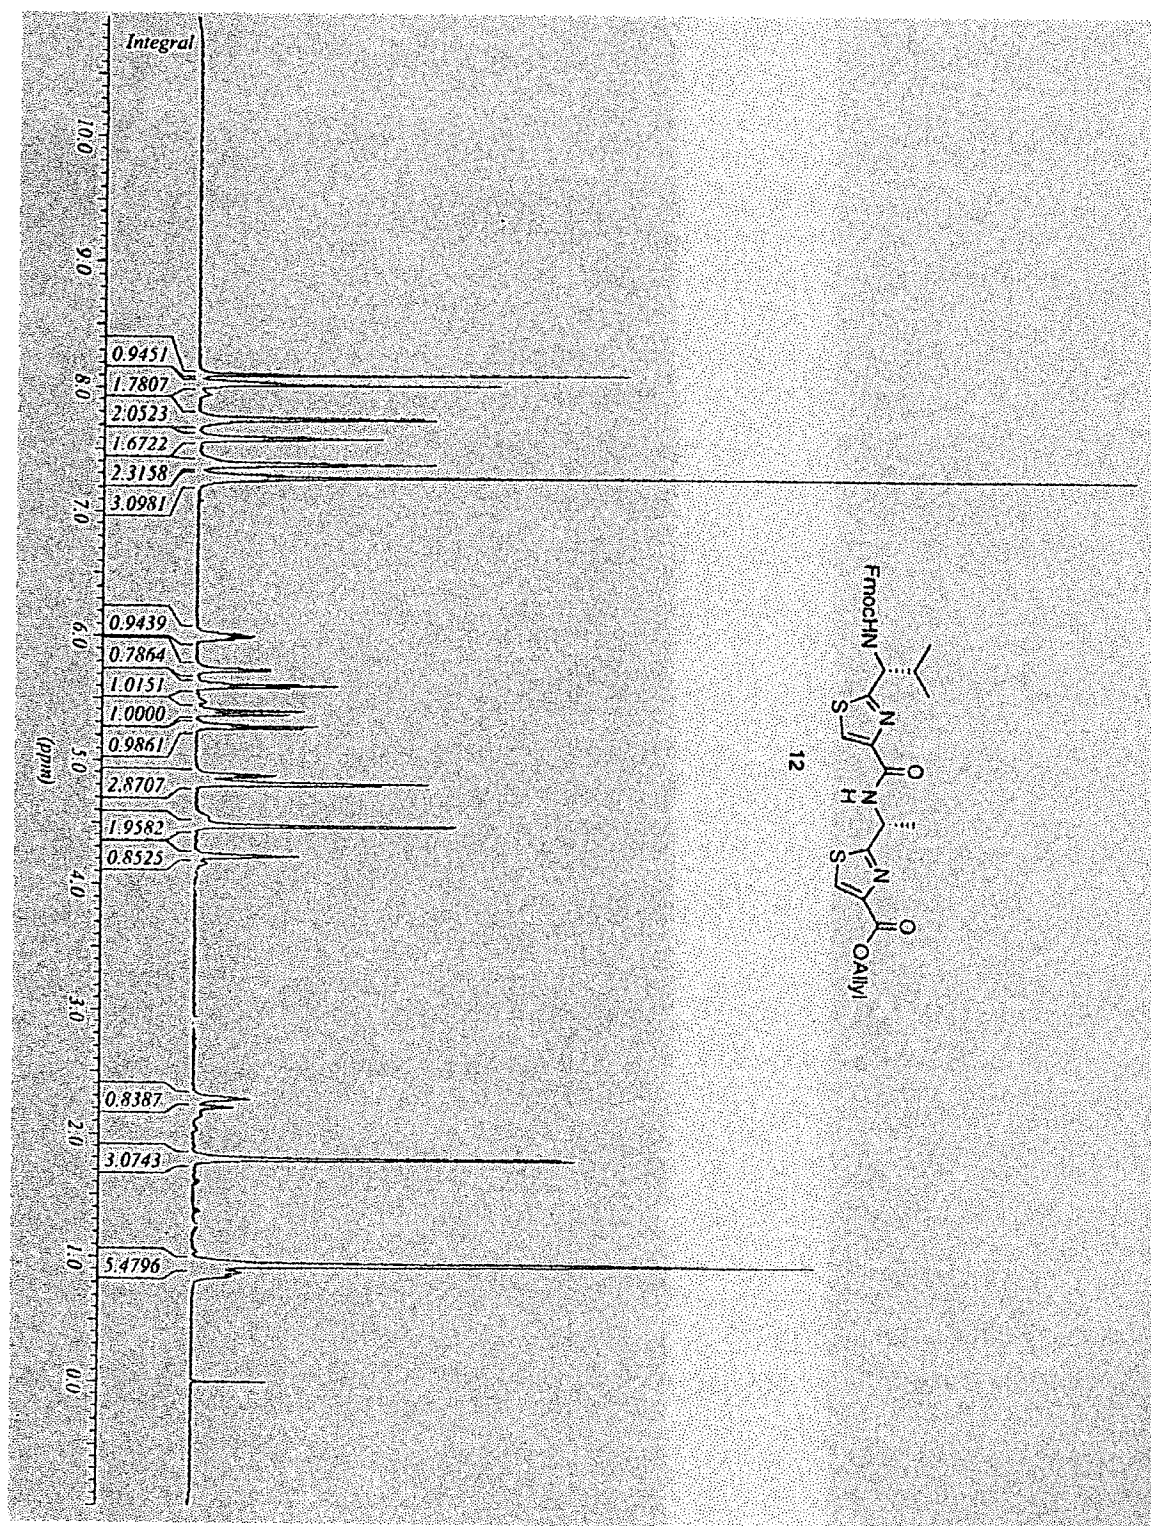

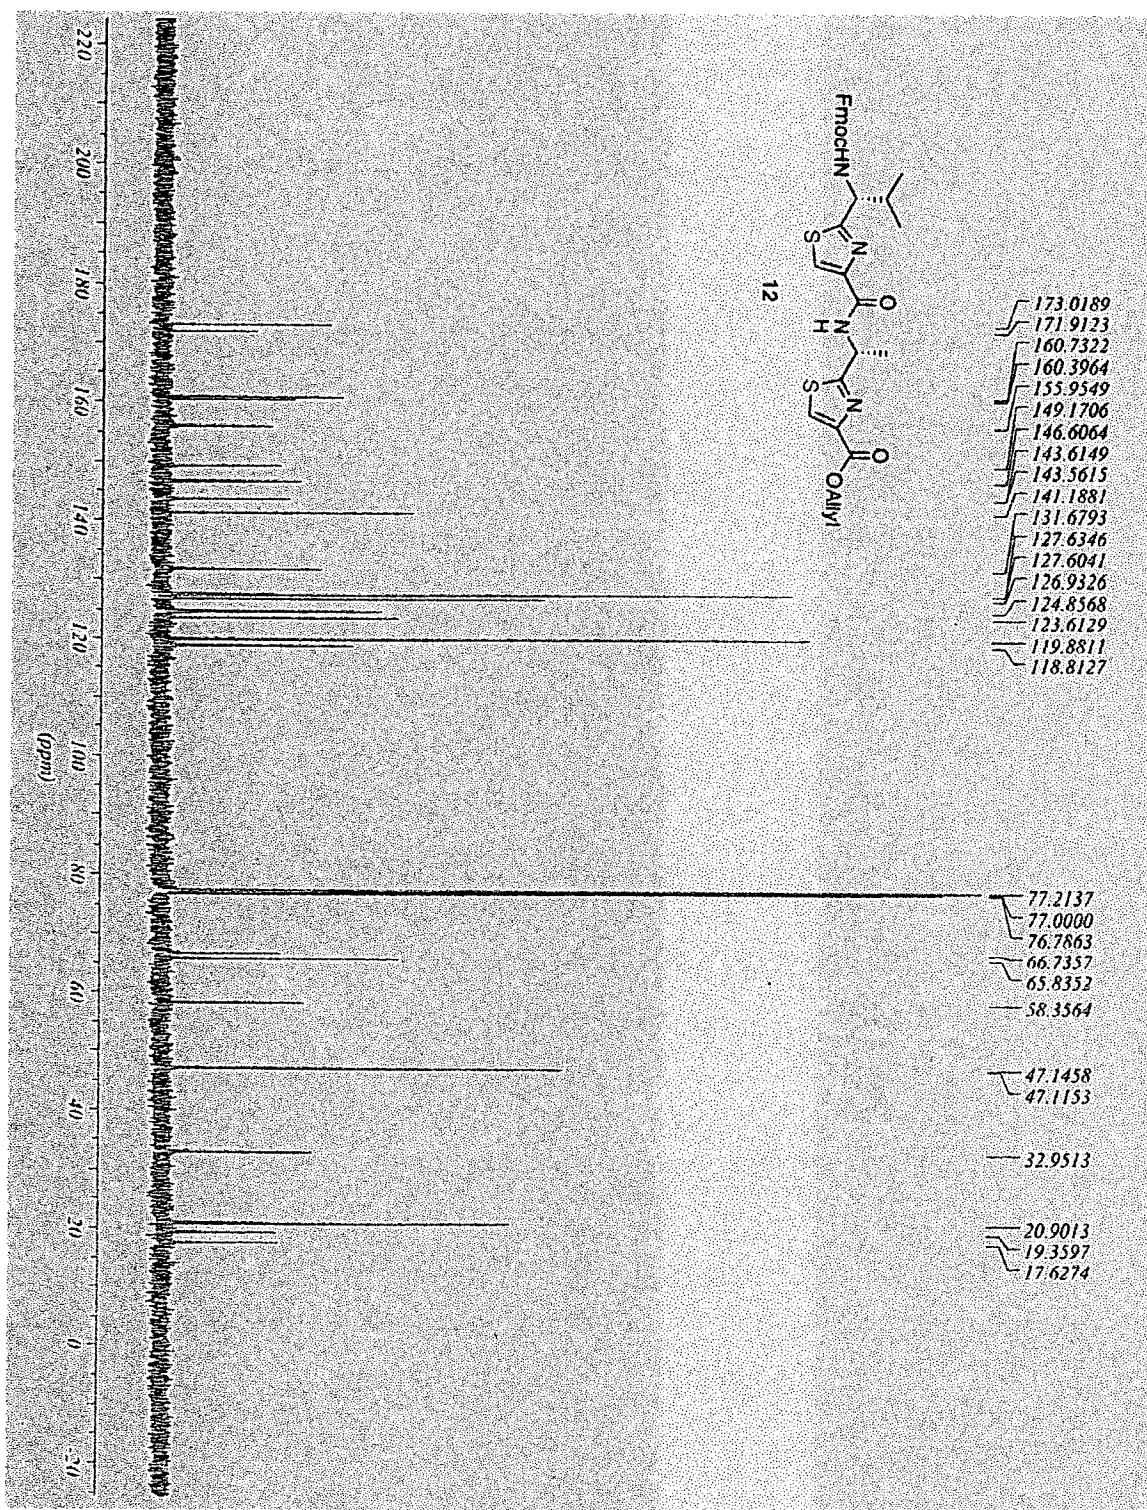



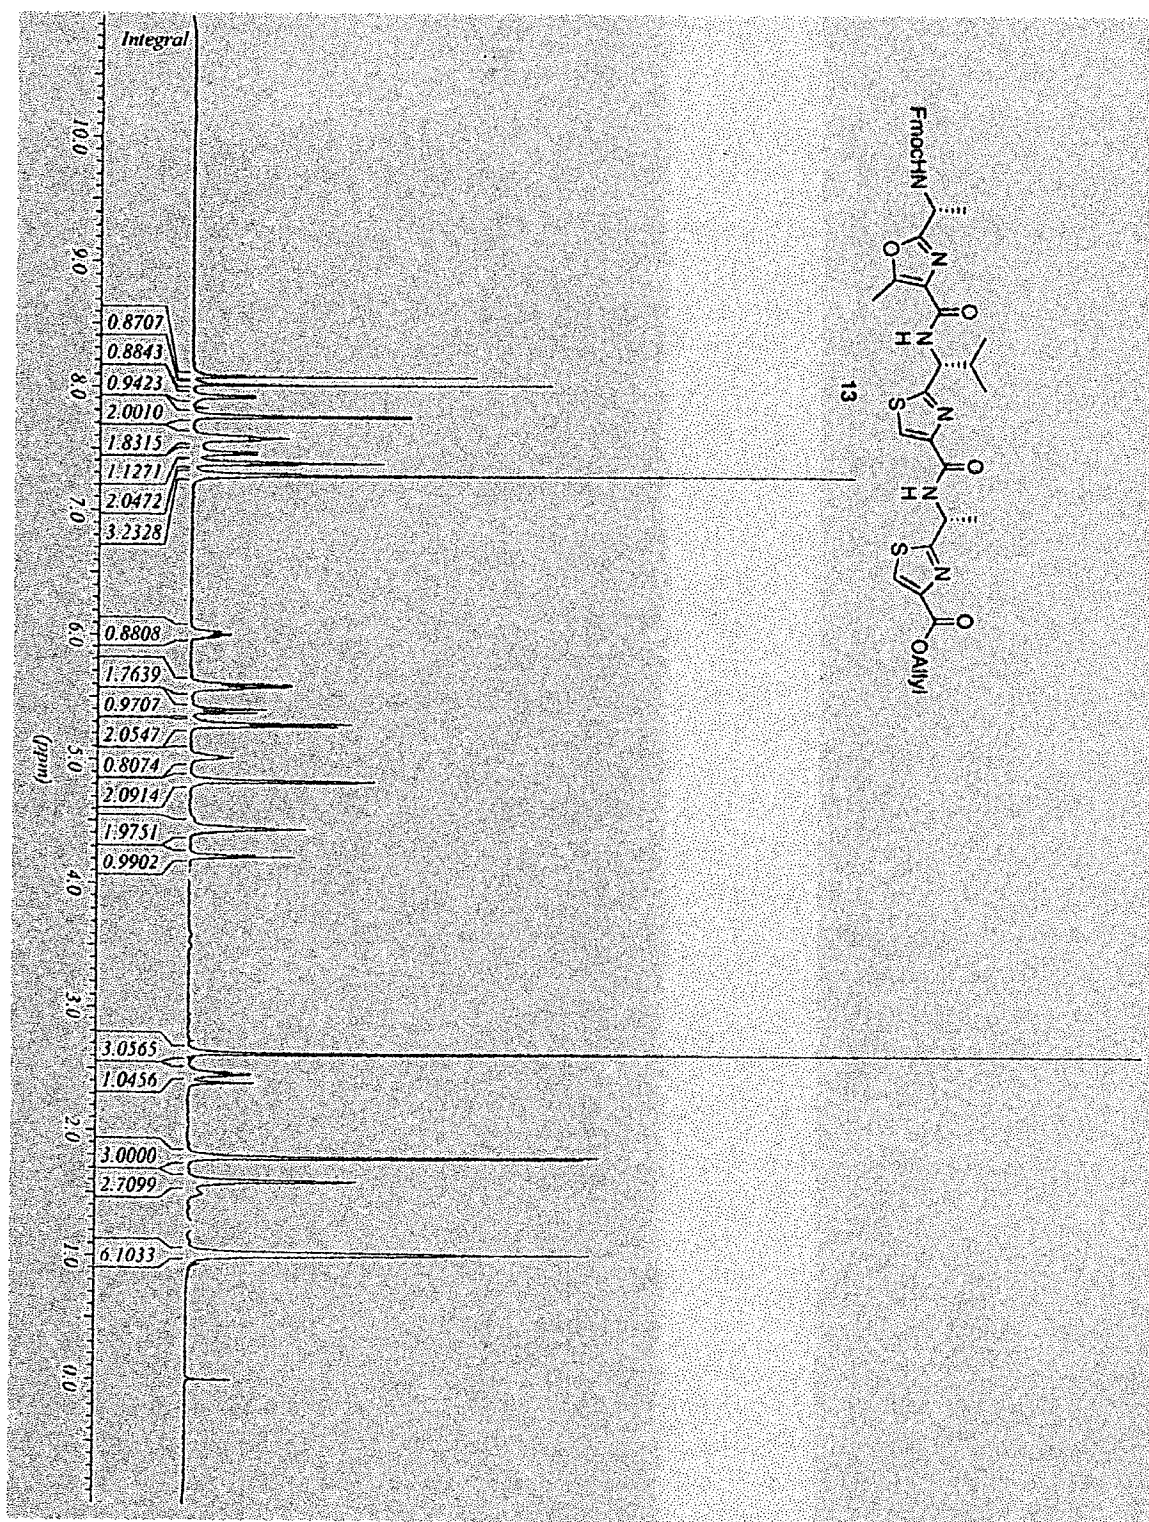

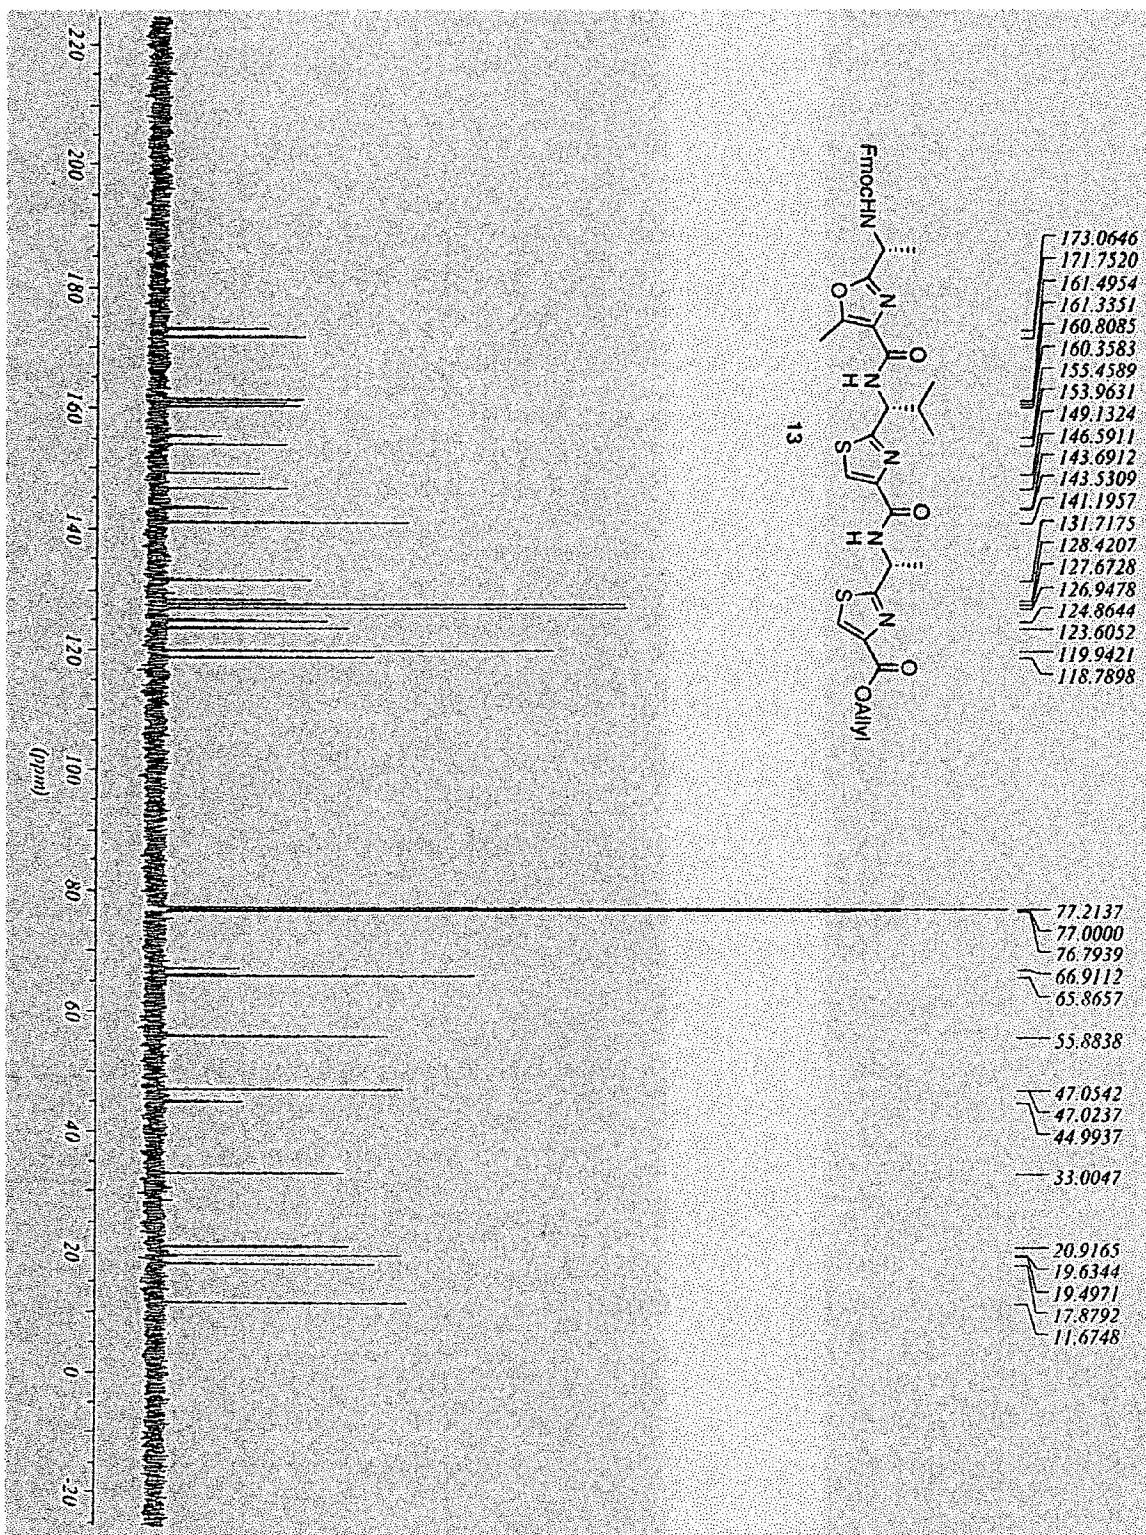

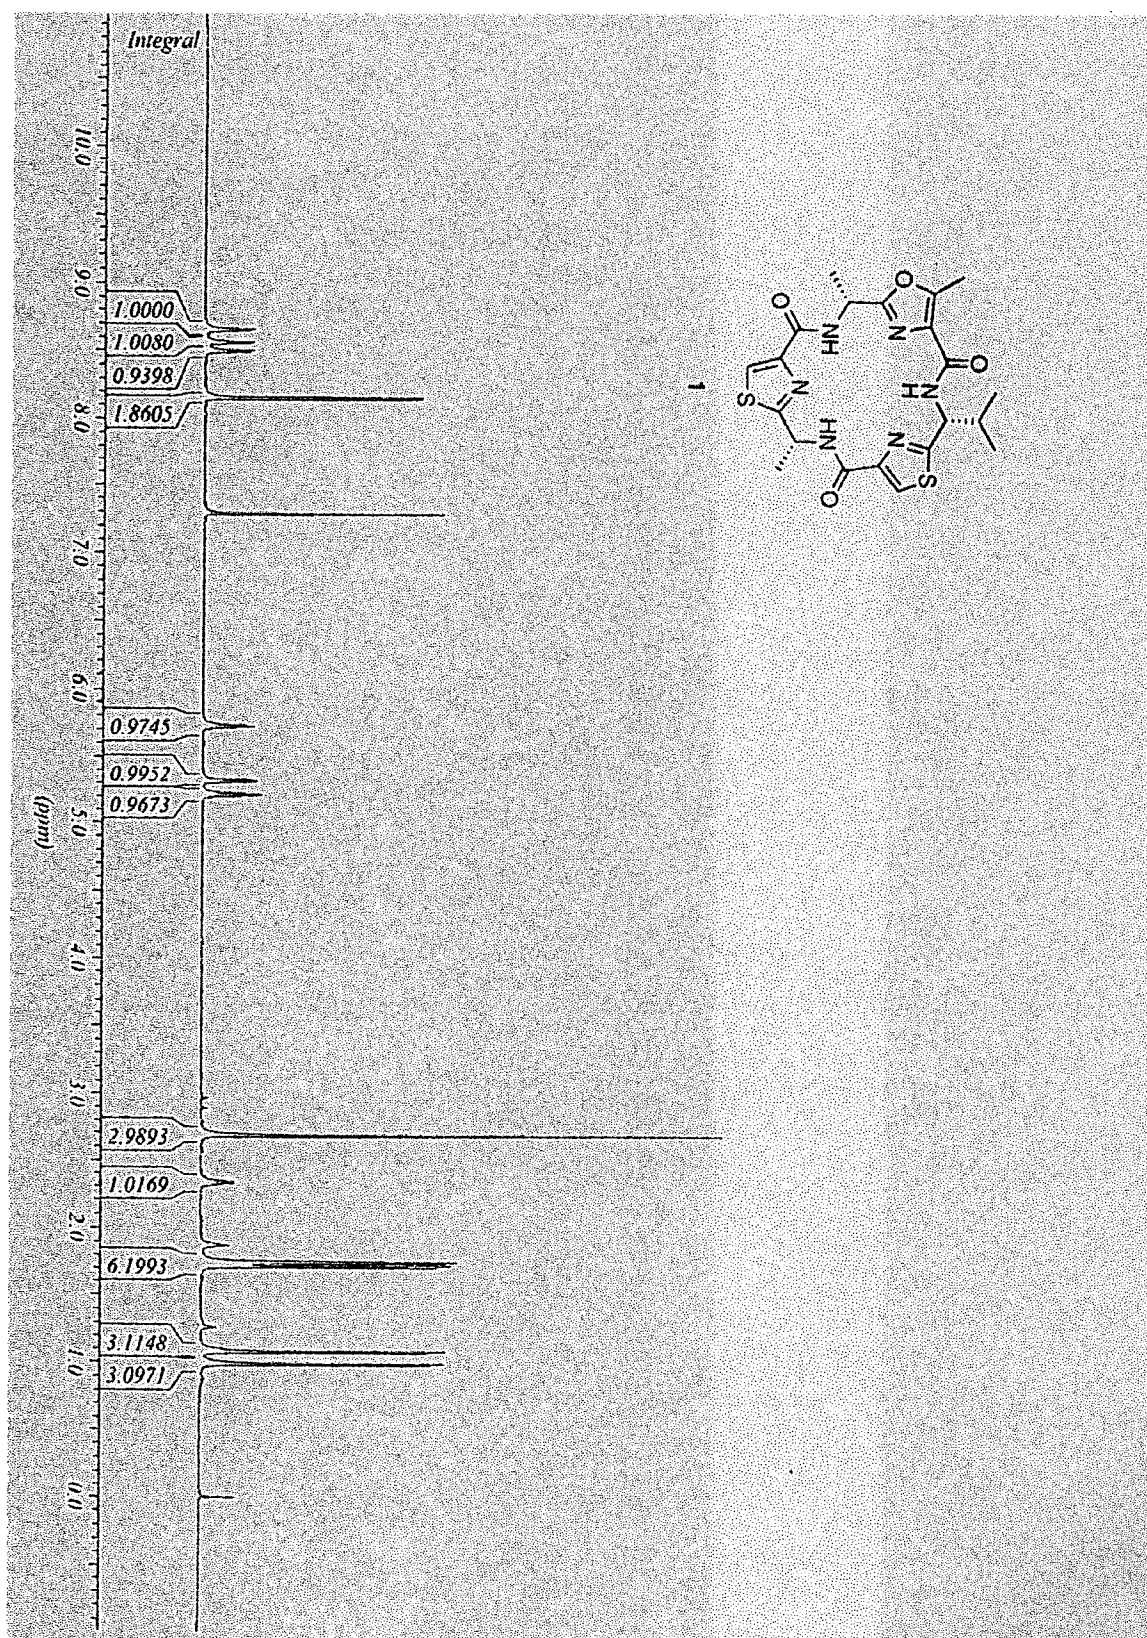



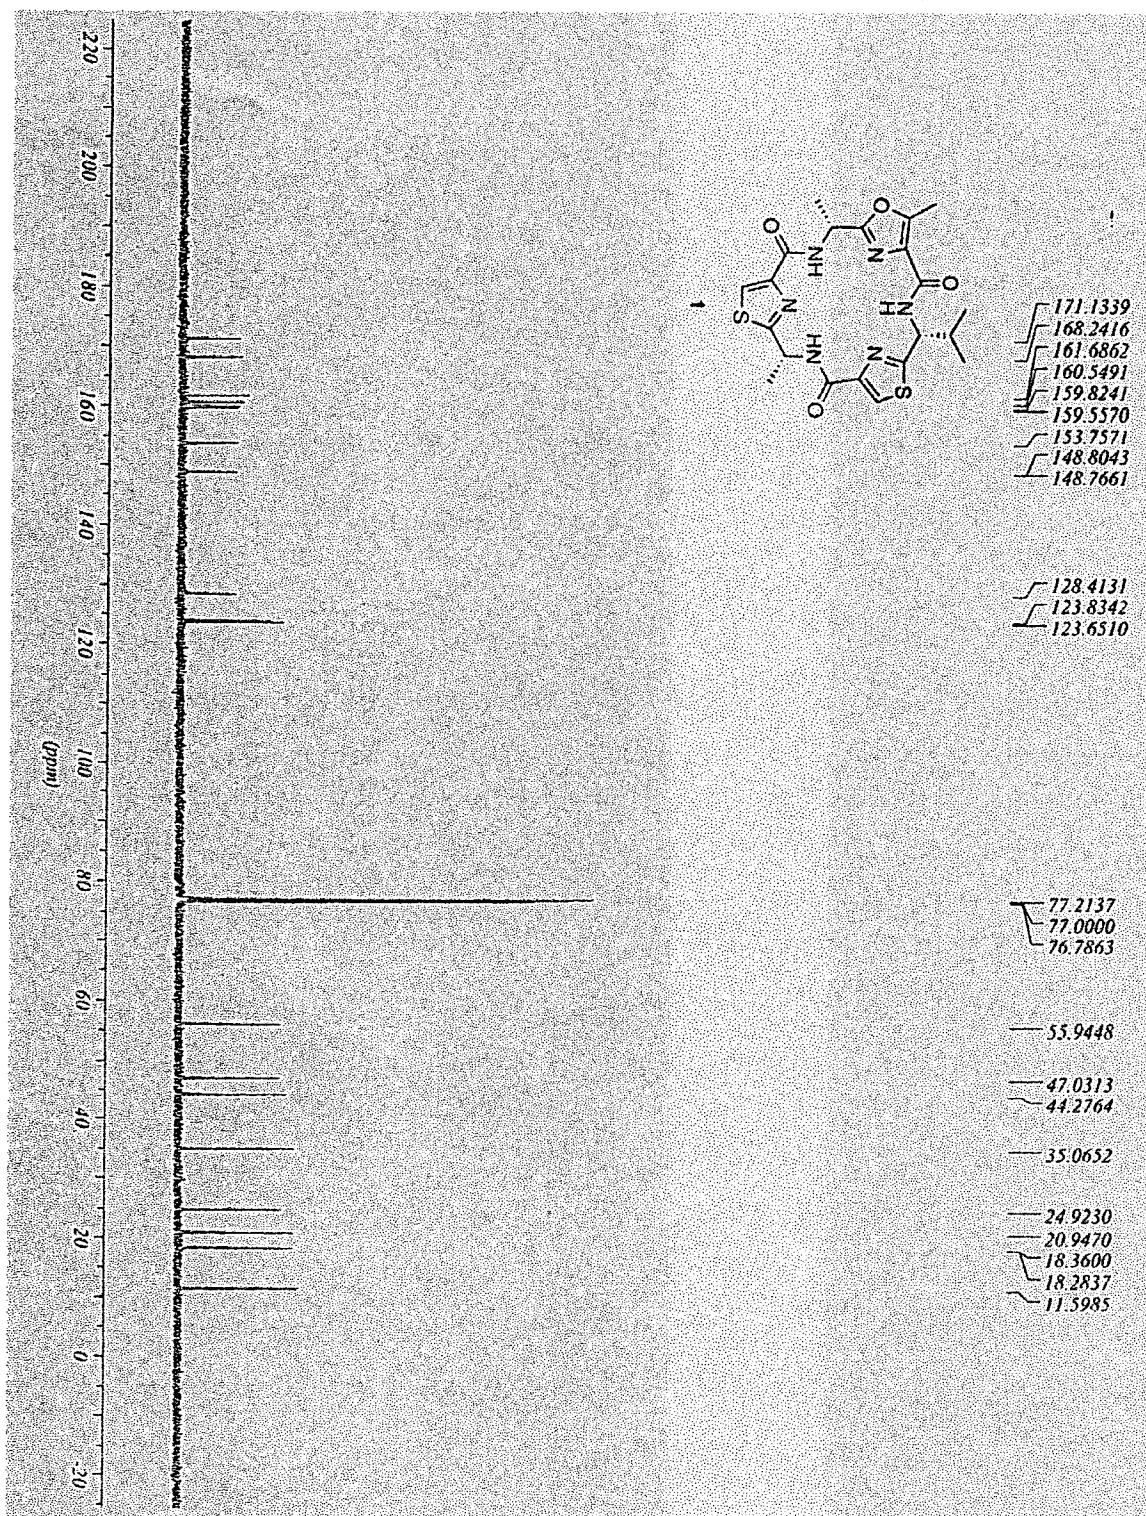

Supplement: Supplementary file 1 [file 5197528]
